# Supplementary material for: Unraveling undiagnosed rare disease cases by HiFi long-read genome sequencing
Source: HighWire-hosted journal article supplement (doi:10.1101/gr.279414.124), 2025-03-26
Supplement: Supplemental_Table_S1.xlsx [file Supplemental_Table_S1.xlsx]

## Sheet: Table
Participant ID	Cohort	Gender	Family	Ern	DiseaseStatus
P0410957	Unsolved	M	W22-1810	EpiCARE	A
P0569527	Unsolved	M	W22-1810	EpiCARE	NA
P0590943	Unsolved	F	W22-1810	EpiCARE	NA
P0701930	Unsolved	F	W22-1811	EpiCARE	NA
P0840247	Unsolved	M	W22-1811	EpiCARE	NA
P0977091	Unsolved	F	W22-1811	EpiCARE	A
P0414188	Unsolved	M	W22-1812	EpiCARE	NA
P0654592	Unsolved	F	W22-1812	EpiCARE	NA
P0844990	Unsolved	M	W22-1812	EpiCARE	A
P0250627	Unsolved	F	W22-1813	EpiCARE	NA
P0711053	Unsolved	M	W22-1813	EpiCARE	NA
P0931331	Unsolved	M	W22-1813	EpiCARE	A
P0780205	Unsolved	F	W22-1814	EpiCARE	NA
P0846061	Unsolved	M	W22-1814	EpiCARE	NA
P0931200	Unsolved	M	W22-1814	EpiCARE	A
P0270361	Unsolved	F	W22-1928	EpiCARE	NA
P0749157	Unsolved	F	W22-1928	EpiCARE	A
P0980161	Unsolved	M	W22-1928	EpiCARE	NA
P0252261	Unsolved	M	W22-1929	EpiCARE	A
P0803871	Unsolved	M	W22-1929	EpiCARE	NA
P0858235	Unsolved	F	W22-1929	EpiCARE	NA
P0017591	Unsolvables	F	W08-0526	ITHACA	A
P0017592	Unsolvables	F	W08-0526	ITHACA	NA
P0017593	Unsolvables	M	W08-0526	ITHACA	NA
P0018599	Unsolvables	F	W08-1567	ITHACA	NA
P0018603	Unsolvables	M	W08-1567	ITHACA	NA
P0018614	Unsolvables	M	W08-1567	ITHACA	A
P0018619	Unsolvables	M	W11-0647	ITHACA	A
P0018609	Unsolvables	M	W13-1002	ITHACA	A
P0018616	Unsolvables	F	W13-1002	ITHACA	NA
P0018617	Unsolvables	M	W13-1002	ITHACA	NA
P0018602	Unsolvables	F	W18-1254	ITHACA	A
P0018606	Unsolvables	M	W18-1254	ITHACA	NA
P0018613	Unsolvables	F	W18-1254	ITHACA	NA
P0018615	Unsolvables	F	W18-1254	ITHACA	NA
P0012598	Unsolvables	M	W19-0933	ITHACA	A
P0013136	Unsolvables	M	W19-0933	ITHACA	NA
P0013760	Unsolvables	F	W19-0933	ITHACA	NA
P0018008	Unsolvables	F	W19-1675	ITHACA	A
P0018009	Unsolvables	M	W19-1675	ITHACA	NA
P0018010	Unsolvables	F	W19-1675	ITHACA	NA
P0018622	Unsolvables	F	W20-0288	ITHACA	A
P0018623	Unsolvables	M	W20-0288	ITHACA	NA
P0018624	Unsolvables	F	W20-0288	ITHACA	NA
P0009906	Unsolvables	F	W20-0894	ITHACA	A
P0019331	Unsolvables	M	W20-0894	ITHACA	NA
P0019332	Unsolvables	F	W20-0894	ITHACA	NA
P0007329	Unsolvables	F	W20-0895	ITHACA	A
P0008632	Unsolvables	F	W20-0895	ITHACA	NA
P0009975	Unsolvables	F	W20-0896	ITHACA	A
P0019211	Unsolvables	M	W20-0896	ITHACA	NA
P0019212	Unsolvables	F	W20-0896	ITHACA	NA
P0018773	Unsolvables	M	W20-0897	ITHACA	A
P0018777	Unsolvables	M	W20-0897	ITHACA	NA
P0018778	Unsolvables	F	W20-0897	ITHACA	NA
P0018579	Unsolvables	F	W20-0899	ITHACA	A
P0018580	Unsolvables	M	W20-0899	ITHACA	NA
P0018581	Unsolvables	F	W20-0899	ITHACA	NA
P0018774	Unsolvables	M	W20-0900	ITHACA	A
P0018780	Unsolvables	M	W20-0900	ITHACA	NA
P0018781	Unsolvables	F	W20-0900	ITHACA	NA
P0018512	Unsolved	F	W21-0223	ITHACA	A
P0018513	Unsolved	M	W21-0223	ITHACA	NA
P0018514	Unsolved	F	W21-0223	ITHACA	NA
P0185637	Unsolvables	F	W21-0301	ITHACA	A
P0537419	Unsolvables	F	W21-0301	ITHACA	NA
P0669924	Unsolvables	M	W21-0301	ITHACA	NA
P0946542	Unsolvables	F	W21-0301	ITHACA	NA
P0059261	Unsolved	F	W21-1297	ITHACA	NA
P0498201	Unsolved	M	W21-1297	ITHACA	NA
P0814199	Unsolved	M	W21-1297	ITHACA	A
P0122128	Unsolvables	F	W21-1309	ITHACA	NA
P0278916	Unsolvables	M	W21-1309	ITHACA	NA
P0596717	Unsolvables	F	W21-1309	ITHACA	A
P0019609	Unsolvables	M	W21-1373	ITHACA	A
P0019610	Unsolvables	F	W21-1373	ITHACA	NA
P0010030	Unsolvables	F	W21-1374	ITHACA	A
P0010149	Unsolvables	M	W21-1374	ITHACA	NA
P0010150	Unsolvables	F	W21-1374	ITHACA	NA
P0018770	Unsolvables	M	W21-1376	ITHACA	A
P0018771	Unsolvables	M	W21-1376	ITHACA	NA
P0018772	Unsolvables	F	W21-1376	ITHACA	NA
P0020327	Unsolvables	M	W21-1377	ITHACA	A
P0020328	Unsolvables	F	W21-1377	ITHACA	NA
P0020329	Unsolvables	M	W21-1377	ITHACA	NA
P0537031	unsolved	F	W21-1892	ITHACA	A
P0184206	Unsolved	M	W21-2200	ITHACA	A
P0741865	Unsolved	F	W21-2200	ITHACA	NA
P0857946	Unsolved	M	W21-2200	ITHACA	NA
P0405623	Unsolvables	F	W21-2250	ITHACA	NA
P0640809	Unsolvables	M	W21-2250	ITHACA	NA
P0850372	Unsolvables	F	W21-2250	ITHACA	A
P0113077	Unsolved	F	W22-2273	ITHACA	A
P0185634	Unsolved	F	W22-2273	ITHACA	NA
P0874601	Unsolved	M	W22-2273	ITHACA	NA
P0057486	Unsolved	F	W22-2274	ITHACA	NA
P0058823	Unsolved	F	W22-2274	ITHACA	A
P0130556	Unsolved	M	W22-2274	ITHACA	NA
P0273321	Unsolved	M	W22-2275	ITHACA	NA
P0450193	Unsolved	M	W22-2275	ITHACA	A
P0828106	Unsolved	F	W22-2275	ITHACA	NA
P0744295	Unsolved	M	W22-2276	ITHACA	A
P0872686	Unsolved	M	W22-2276	ITHACA	NA
P0903803	Unsolved	F	W22-2276	ITHACA	NA
P0182871	Unsolved	F	W22-2277	ITHACA	NA
P0640751	Unsolved	M	W22-2277	ITHACA	NA
P0980478	Unsolved	NN	W22-2277	ITHACA	A
P0610589	unsolved	F	W95-167	ITHACA	A
P0144374	unsolved	M	W95-211	ITHACA	A
P0455281	unsolved	M	W21-0065	EURO-NMD	A
P0695060	unsolved	M	W21-0066	EURO-NMD	A
P0201185	unsolved	M	W21-1201	EURO-NMD	A
P0245209	unsolved	F	W21-1204	EURO-NMD	A
P0205230	unsolved	F	W21-1205	EURO-NMD	NA
P0936700	unsolved	F	W21-1205	EURO-NMD	A
P0947867	unsolved	M	W21-1205	EURO-NMD	NA
P0064419	unsolved	M	W21-1206	EURO-NMD	A
P0259783	unsolved	M	W21-1208	EURO-NMD	A
P0893495	unsolved	M	W21-1208	EURO-NMD	NA
P0181081	unsolved	F	W21-1208	EURO-NMD	NA
P0436361	unsolved	M	W21-1209	EURO-NMD	A
P0078963	unsolved	M	W21-1210	EURO-NMD	A
P0631224	unsolved	M	W21-1211	EURO-NMD	A
P0463592	unsolved	M	W21-1211	EURO-NMD	NA
P0305830	unsolved	F	W21-1211	EURO-NMD	NA
P0382016	unsolved	F	W21-2068	EURO-NMD	NA
P0752076	unsolved	M	W21-2068	EURO-NMD	NA
P0480188	unsolved	F	W21-2068	EURO-NMD	A
P0005845	unsolved	F	W21-2078	EURO-NMD	A
P0078276	unsolved	F	W21-2078	EURO-NMD	A
P0836790	unsolved	F	W21-2078	EURO-NMD	NA
P0900431	unsolved	M	W21-2078	EURO-NMD	A
P0005862	unsolved	M	W21-2079	EURO-NMD	A
P0451778	unsolved	F	W21-2079	EURO-NMD	NA
P0202949	unsolved	M	W21-2079	EURO-NMD	NA
P0132886	unsolved	F	W21-2079	EURO-NMD	A
P0968240	unsolved	F	W21-2080	EURO-NMD	A
P0150962	unsolved	F	W21-2080	EURO-NMD	NA
P0361151	unsolved	M	W21-2080	EURO-NMD	NA
P0034119	unsolved	M	W21-2132	EURO-NMD	A
P0985747	unsolved	F	W21-2132	EURO-NMD	NA
P0402350	unsolved	M	W21-2132	EURO-NMD	NA
P0008178	unsolved	M	W21-2198	EURO-NMD	A
P0093587	unsolved	M	W21-2198	EURO-NMD	NA
P0007362	unsolved	M	W21-2199	EURO-NMD	A
P0020628	unsolved	F	W21-2199	EURO-NMD	NA
P0337002	unsolved	M	W21-2238	EURO-NMD	A
P0947219	unsolved	M	W21-2238	EURO-NMD	NA
P0021581	unsolved	F	W21-2239	EURO-NMD	A
P0245909	unsolved	M	W21-2239	EURO-NMD	NA
P0847234	unsolved	M	W21-2239	EURO-NMD	NA
P0863892	unsolved	F	W21-2239	EURO-NMD	NA
P0008101	unsolved	F	W21-2725	EURO-NMD	A
P0008100	unsolved	M	W21-2725	EURO-NMD	A
P0149027	unsolved	M	W21-2726	EURO-NMD	A
P0434420	unsolved	F	W21-2726	EURO-NMD	NA
P0313065	unsolved	M	W21-2726	EURO-NMD	NA
P0187292	unsolved	F	W21-2726	EURO-NMD	NA
P0450684	unsolved	M	W21-2726	EURO-NMD	A
P0884455	unsolved	M	W21-2726	EURO-NMD	A
P0664958	unsolved	F	W21-2726	EURO-NMD	NA
P0008963	unsolved	M	W22-0259	EURO-NMD	A
P0304817	unsolved	M	W22-1024	EURO-NMD	A
P0237528	unsolved	M	W22-1587	EURO-NMD	A
P0958540	unsolved	F	W22-1587	EURO-NMD	A
P0460777	unsolved	M	W22-1587	EURO-NMD	NA
P0259258	unsolved	F	W22-1588	EURO-NMD	A
P0849824	unsolved	F	W22-1588	EURO-NMD	A
P0591545	unsolved	M	W22-1588	EURO-NMD	A
P0018415	unsolved	F	W22-1736	EURO-NMD	A
P0018419	unsolved	F	W22-1736	EURO-NMD	A
P0519408	unsolved	M	W22-1736	EURO-NMD	NA
P0018416	unsolved	F	W22-1736	EURO-NMD	NA
P0018417	unsolved	M	W22-1736	EURO-NMD	NA
P0018469	unsolved	M	W22-1737	EURO-NMD	A
P0238669	unsolved	F	W22-1737	EURO-NMD	NA
P0737800	unsolved	M	W22-1743	EURO-NMD	A
P0065591	unsolved	M	W22-1743	EURO-NMD	NA
P0500826	unsolved	F	W22-1743	EURO-NMD	NA
P0018472	unsolved	M	W22-1744	EURO-NMD	A
P0018532	unsolved	F	W22-1744	EURO-NMD	NA
P0018533	unsolved	M	W22-1744	EURO-NMD	NA
P0018481	unsolved	M	W22-1745	EURO-NMD	A
P0411197	unsolved	F	W22-1745	EURO-NMD	NA
P0339838	unsolved	M	W22-1745	EURO-NMD	NA
P0018473	unsolved	M	W22-1747	EURO-NMD	A
P0018568	unsolved	F	W22-1747	EURO-NMD	A
P0018565	unsolved	M	W22-1747	EURO-NMD	NA
P0896861	unsolved	M	W22-1750	EURO-NMD	A
P0012351	unsolved	M	W22-1803	EURO-NMD	A
P0873282	unsolved	F	W22-2425	EURO-NMD	A
P0198522	unsolved	M	W22-2425	EURO-NMD	A
P0679250	unsolved	F	W22-2425	EURO-NMD	A
P0005855	unsolved	F	W22-2672	EURO-NMD	A
P0266464	unsolved	M	W22-2672	EURO-NMD	A
P0365571	unsolved	M	W23-0095	EURO-NMD	A
P0335994	unsolved	F	W23-0095	EURO-NMD	A
P0657753	unsolved	M	W23-0096	EURO-NMD	A
P0016368	unsolved	M	W20-0068	RND	A
P0018504	unsolved	F	W20-0068	RND	A
P0002955	unsolved	M	W20-0638	RND	A
P0019029	unsolved	M	W20-0638	RND	A
P0019030	unsolved	F	W20-0638	RND	NA
P0019032	unsolved	F	W20-0641	RND	A
P0143230	unsolved	M	W20-0641	RND	NA
P0001479	unsolved	M	W20-0646	RND	A
P0019043	unsolved	M	W20-0646	RND	A
P0003288	unsolved	M	W20-0648	RND	A
P0003289	unsolved	M	W20-0648	RND	A
P0011966	unsolved	M	W20-0648	RND	A
P0019044	unsolved	M	W20-0648	RND	NA
P0019049	unsolved	M	W20-0648	RND	A
P0011758	unsolved	M	W20-0729	RND	A
P0011759	unsolved	M	W20-0729	RND	A
P0018350	unsolved	M	W20-0729	RND	NA
P0011769	unsolved	F	W20-0731	RND	A
P0011770	unsolved	M	W20-0731	RND	A
P0011781	unsolved	M	W20-0732	RND	A
P0011782	unsolved	M	W20-0732	RND	A
P0011783	unsolved	M	W20-0733	RND	A
P0011784	unsolved	F	W20-0733	RND	A
P0011788	unsolved	F	W20-0734	RND	A
P0011789	unsolved	M	W20-0734	RND	A
P0003273	unsolved	M	W20-0737	RND	A
P0011878	unsolved	F	W20-0737	RND	A
P0018364	unsolved	M	W20-0737	RND	NA
P0015968	unsolved	F	W20-0738	RND	A
P0015973	unsolved	M	W20-0738	RND	A
P0015996	unsolved	F	W20-0739	RND	A
P0018694	unsolved	M	W20-0739	RND	A
P0016165	unsolved	M	W20-0741	RND	A
P0016174	unsolved	M	W20-0741	RND	A
P0018356	unsolved	M	W20-0741	RND	NA
P0016216	unsolved	F	W20-0744	RND	A
P0016217	unsolved	F	W20-0744	RND	A
P0018371	unsolved	F	W20-0744	RND	NA
P0018397	unsolved	F	W20-0760	RND	A
P0018430	unsolved	F	W20-0760	RND	NA
P0019146	unsolved	M	W20-0760	RND	A
P0003275	unsolved	M	W20-0763	RND	A
P0011853	unsolved	F	W20-0763	RND	A
P0018359	unsolved	M	W20-0763	RND	NA
P0019100	unsolved	M	W20-0853	RND	A
P0019101	unsolved	M	W20-0853	RND	A
P0019102	unsolved	F	W20-0853	RND	NA
P0016356	unsolved	F	W21-1357	RND	A
P0019033	unsolved	M	W21-1357	RND	A
P0019037	unsolved	F	W21-1359	RND	NA
P0016417	unsolved	F	W21-1359	RND	A
P0016418	unsolved	F	W21-1359	RND	A
P0018996	unsolved	M	W21-1360	RND	A
P0019023	unsolved	F	W21-1360	RND	A
P0019024	unsolved	M	W21-1360	RND	NA
P0019025	unsolved	F	W21-1362	RND	NA
P0019021	unsolved	F	W21-1362	RND	A
P0019026	unsolved	F	W21-1362	RND	A
P0019022	unsolved	F	W21-1363	RND	A
P0019027	unsolved	M	W21-1363	RND	A
P0019028	unsolved	F	W21-1363	RND	NA
P0011716	unsolved	M	W21-1383	RND	A
P0018035	unsolved	F	W21-1383	RND	NA
P0018664	unsolved	M	W21-1383	RND	A
P0011734	unsolved	M	W21-1385	RND	A
P0011735	unsolved	F	W21-1385	RND	A
P0003276	unsolved	M	W21-1386	RND	A
P0011742	unsolved	M	W21-1386	RND	A
P0018349	unsolved	F	W21-1386	RND	NA
P0003290	unsolved	F	W21-1394	RND	A
P0011838	unsolved	M	W21-1394	RND	A
P0015601	unsolved	F	W21-1803	RND	A
P0016776	unsolved	M	W21-1803	RND	A
P0016777	unsolved	F	W21-1803	RND	NA
P0018410	unsolved	F	W21-1804	RND	A
P0018411	unsolved	M	W21-1804	RND	A
P0018424	unsolved	F	W21-1804	RND	NA
P0016131	unsolved	M	W21-1873	RND	A
P0018489	unsolved	F	W21-1873	RND	A
P0016344	unsolved	M	W21-1875	RND	A
P0018492	unsolved	F	W21-1875	RND	A
P0018493	unsolved	M	W21-1875	RND	NA
P0018500	unsolved	F	W21-1881	RND	A
P0018517	unsolved	M	W21-2303	RND	A
P0018518	unsolved	M	W21-2303	RND	A
P0011744	unsolved	M	W22-1570	RND	A
P0551292	unsolved	F	W22-1570	RND	A
P0011848	unsolved	M	W22-1571	RND	A
P0020304	unsolved	M	W22-1571	RND	A
P0016160	unsolved	F	W22-1572	RND	A
P0859417	unsolved	F	W22-1572	RND	A
P0020381	unsolved	F	W22-1573	RND	A
P0020382	unsolved	M	W22-1573	RND	A
P0276815	unsolved	F	W22-1573	RND	NA
P0020839	unsolved	F	W22-1574	RND	A

## Sheet: Legend
Overview of study cohort. The participant ID can be found in column A. Column B indicates the subcohort (‘unsolvables’ or ‘unsolved’) to which the participant belongs. Gender, family identifier, ERN and Disease status ((A)ffected or (N)ot (A)ffected) can respectively be found in columns C, D, E and F.
