# Supplementary material for: Unraveling undiagnosed rare disease cases by HiFi long-read genome sequencing
Source: HighWire-hosted journal article supplement (doi:10.1101/gr.279414.124), 2025-03-26
Supplement: Supplemental_Table_S2.xlsx [file Supplemental_Table_S2.xlsx]

## Sheet: Table
Patient details			Variant details					Classification details			Previous testing
								SNVs classified according to: ACGS Best Practice Guidelines for Variant Classification in Rare Disease 2024; Using the ACMG/AMP framework to capture evidence related to predicted and observed impact on splicing: Recommendations from the ClinGen SVI Splicing Subgroup. SVs/STRs classified based on 2-level expert review, see motivation column.			If a test has been performed in only one of two family members, the ID of the patient for whom the test was performed is given in parentheses. In other cases the test was performed for all individuals given in the "Proband ID" column.
Proband ID	ERN	Cohort	Gene	Transcript	Genomic annotation (hg38)	Coding sequence	Protein sequence	Class	ACMG Criteria	2-level expert review	Short-read genome	Exome sequencing	Gene panel	Sanger sequencing	Other (MLPA, array, etc.)	Details
P0078963	EURO-NMD	Unsolved	DMD	NM_004006.3	ChrX:g.23308848 _32004110inv			Pathogenic		This event is an inversion of 8.7 Mb, which breaks DMD (Dystrophin, MIM ID *303377, NM_004006.3) in intron 44, resulting in a truncated transcript. Truncating variants are known causes of Duchenne Muscular Dystrophy, which is consistent with the phenotype.	NO	NO	NO	YES	YES	Sanger sequencing of DMD. MLPA of DMD. OGM. DMD locus linkage of 3 affected siblings and mother. RT-PCR cDNA analysis of DMD.
P0631224	RND	Unsolved	TTN	NM_001267550.2	Chr2:g.178530761dup;Chr2:g.178640613del	c.105854dup;c.40652del	p.(Pro35286Thrfs*13);p.(Pro13551Glnfs*47)	Pathogenic;Pathogenic	PVS1, PM2, PM3, PP5_no influence		YES	YES	YES	YES	YES	Gene panel incl. RYR1, MTM1, DNM2, CCDC78, MTMR14, ORAI1, SPEG, STIM1, TTN. Sanger sequencing of RYR1, BIN1, MTM1, DNM2, DMD. MLPA of DMD.
P0936700	EURO-NMD	Unsolved	FGF13;MFC2;F9	NM_004114.5;NM_001171876.2;NM_000133.4	ChrX:g.139164887_139679311dup			VUS		The breakpoints of the duplication disrupt two genes; FGF13 (fibroblast growth factor 13, MIM ID *300070, NM_004114.5), and MCF2 (Cell line-derived transforming sequence, *311030, NM_001171876.2). The duplication results in a hypothetical FGF13-MCF2 fusion gene, in which the breakpoint resides within the second intron of FGF13 and the first intron of MCF2. The second exon of MCF2 is usually parti…	YES	YES	YES	YES	YES	Gene panel incl. TTN, STAC4, PIEZO2, BIN1, CCDC78, DNM2, MTM1, MTMR14, RYR1, SCN4A, SPEG, TTN. Sanger sequencing of ACTA1, TPM2, TPM3, RYR1. MLPA of SMN1. RNASeq (SolveRD). Microarray (Illumina Beadchip CytoSNP850K). Only nonsense, frameshift, and splice site variants in TTN were investigated.
P0021581	EURO-NMD	Unsolved	PSMA3	NM_002788.4	Chr14:g.58268649_58283944del			VUS		This 15.3 kb deletion on Chromosome 14 affects the three last exons (ex 9-11) of PSMA3 (Proteasome subunit, Alpha type, 3, MIM ID *176843, NM_002788.4).	NO	NO	YES	YES	YES	Sanger sequencing of NTRK1, KCNH2, MYH7, CAPRIN1. SNP-array.
P0237528	EURO-NMD	Unsolved	REEP1	NM_001371279.1	Chr2:g.86327804T>C	c.32+9675A>G	p.(spl?)	VUS	PP1_moderate, PM2, PP3		YES	NO	NO	NO	NO	SR-WGS as part of 100k genome project; only gene panels analyzed.
P0016368, P0018504	RND	Unsolved	NOP56	NM_006392.4	Chr20:g.2652734_2652756GGCCTG[1200]			Pathogenic		The pathogenic repeat threshold of NOP56 is generally regarded to be 650 hexanucleotide repeats, however, shorter repeats are also known to be causative (PMID: 25476002)	YES	YES (P0016368)	NO	NO	YES	Agilent_SureSelect_v6_60Mb (Exome); confirmation of NOP56 through targeted RP-PCR both; sr-RNAseq for P0018504
P0018996, P0019023	RND	Unsolved	NOP56	NM_006392.4	Chr20:g.2652734_2652756GGCCTG[34]			Pathogenic		The pathogenic repeat threshold of NOP56 is generally regarded to be 650 hexanucleotide repeats, however, shorter repeats are also known to be causative (PMID: 25476002)	YES	YES (P0019023)	NO	NO	YES	confirmation of NOP56 through targeted RP-PCR both; sr-RNAseq for P0018996
P0016356	RND	Unsolved	DAB1	NM_001365792.1	Chr1:g.57367044_57367118AAAAT[29]GAAAT[117]AAAAT[615]			Pathogenic		Age-dependent penetrant alleles have been reported to have an insertion of 31-75 ATTTC repeats, while the normal motifs are usually uninterrupted and consisting of 7-400 units of ATTTT (PMID: 31145571).	YES	YES	NO	NO	YES	Agilent_SureSelect_v6_60Mb (exome); sr-RNAseq
P0019022, P0019027	RND	Unsolved	RFC1	NM_002913.5	Chr4:g.39348427_39348476delinsAAGGG[1181];Chr4:g.39348427_39348476delinsAAGGG[271]			Pathogenic;Pathogenic		Repeat expansions of over 12 AAGGG repeats in RFC1 are known to cause CANVAS-spectrum disorder (“Cerebellar ataxia, neuropathy, and vestibular areflexia syndrome”, MIM ID #614575), which is consistent with the phenotype.	YES	YES (P0019027)	NO	NO	YES (P0019027)	Agilent_SureSelect_v6_60Mb (exome); sr-RNAsewq for P0019022
P0185637	ITHACA	Unsolvable	TUBA1A	NM_006009.4	Chr12:g.49185725C>T	c.641G>A	p.(Arg214His)	Pathogenic	PS2, PS3, PM1, PM2, PM5, PP2_no influence, PP3, PP5_no influence		NO	NO	NO	NO	NO	No previous testing outside SolveRD. Novel Omics LR-WGS,Novel Omics Deep-WES,Novel Omics SR-WGS,Novel Omics OGM.
P0657753	EURO-NMD	Unsolved	MYOT	NM_006790.3	Chr5:137832296_137897203dup			Likely pathogenic		Segregates with disease in the family; clinical investigation and functional experiments are in strong support of causality. The variant is subject for another publication, data not shared here.	NO	NO	YES	NO	YES	Gene panel Myofibrillar myopathies (showed duplication). CGH-array (showed duplication).
P0695060	EURO-NMD	Unsolved	DMD;NHS	NM_004006.3;NM_001291867.2	ChrX:g.17398320_32130845inv			Pathogenic		This event breaks DMD (Dystrophin, MIM ID *300377, NM_004006.3) in intron 44 and NHS (NHS actin remodeling regulator, MIM ID *300457, NM_0129186.2) in intron 1. The inversion results in two theoretical fusion genes in which the exon orientation is conserved, but essentially acts and should be regarded as a truncating variant of (at least) DMD, which is consistent with the phenotype.	NO	NO	YES	NO	YES	Custom SRS panel, MLPA of DMD, CGH-array for DMD, Dystrophin transcript analysis by custom micro-fluidic exome array (FluiDMD, Bovolenta et al. Hum Mutat. 2012)
P0537031	ITHACA	Unsolved			Chr4:165447976_170473344dup			VUS		The duplicated sequence involves several known disease-causing genes, amongst which NEK1 (MIM ID *604588), and CLCN3 (MIM ID *600580). Variants in NEK1 are a known cause of a form of thoracic dysplasia (short-rib thoracic dysplasia 6 with or without polydactyly, MIM ID #263520). This syndrome involves cleft palate, and enlargement of the lateral ventricles; however, it is also characterized by se…	NO	YES	NO	NO	NO	WES-trio, OMIM panel 2017 incl. de novo SNV/indel/CNV (negative). CytoScanHD array performed after LRS discovery of dup, dup confirmed.
P0008178	EURO-NMD	Unsolved	DMD	NM_004006.3	ChrX:g.33174335C>T	c.31+36947G>A		Pathogenic	PSV1, PS4_moderate, PM2, PP5_no influence		NO	YES	YES	NO	YES	MYO-SEQ analysis (Topf 2020)
P0016160, P0859417	RND	Unsolved	SPAST	NM_041946.4	Chr2:g.32115840G>A,	c.1004+5G>A, p.(spl), SPAST	p.(spl)	Pathogenic	PVS1, PP1_supporting, PM2, PP3		YES	YES	NO	NO	NO	SR-WGS
P0011781, P0011782	RND	Unsolved	REEP1	NM_001371279.1	Chr2:g.86232216_86233399del	c.418-597_595+409del		Pathogenic		This deletion encompasses exon 6 of REEP1, leading to a frameshift and premature stop codon. Truncating variants in REEP1 are known to cause hereditary spastic paraplegia.	YES	NO	NO	NO	NO	SR-WGS
P0016165, P0016174	RND	Unsolved			Chr2:231348004_231684006dup			VUS		The duplicated sequence has a breakpoint within ARMC9 (armadillo repeat-containing protein 9, MIM ID *617612, NM_001352754.2) and contains NCL (nucleolin, MIM ID *164035, NM_005381.3), among other genes. RNA-seq confirmed upregulation NCL within the duplicated sequence.	YES	YES	NO	NO	NO	SR-WGS

## Sheet: Legend
Overview of (candidate) disease-causing variants in the cohort. Column A contains the identifier for the respective sample. Columns B and C respectively represent the ERN (European Reference Network) and subcohort of the sample. Columns D to H provide the variant details of the disease-causing or candidate disease-causing variant identified in the sample. Variant classification details are locate…
