# Supplementary material for: Unraveling undiagnosed rare disease cases by HiFi long-read genome sequencing
Source: HighWire-hosted journal article supplement (doi:10.1101/gr.279414.124), 2025-03-26
Supplement: Supplemental_Table_S3.xlsx [file Supplemental_Table_S3.xlsx]

## Sheet: Table
Participant ID	Ern	BND ≥ 20 bp	BND ≥ 50 bp	DEL ≥ 20 bp	DEL ≥ 50 bp	DUP ≥ 20 bp	DUP ≥ 50 bp	INS ≥ 20 bp	INS ≥ 50 bp	INV ≥ 20 bp	INV ≥ 50 bp	SV_SUM ≥ 20 bp	SV_SUM ≥ 50 bp	SNV_SUM
P0017591	Ithaca	103	103	23352	9471	2865	548	26683	12574	293	293	53296	22989	4802350
P0017592	Ithaca	94	94	23396	9583	2846	572	26560	12669	207	207	53103	23125	4798518
P0017593	Ithaca	72	72	23569	9711	2849	558	26523	12735	197	197	53210	23273	4701481
P0018614	Ithaca	67	67	23107	9633	2915	519	27309	12846	325	325	53723	23390	4723689
P0018599	Ithaca	59	59	22078	9098	2794	462	27068	12208	344	344	52343	22171	4393376
P0012598	Ithaca	70	70	23283	9648	2887	560	27045	12722	357	357	53642	23357	4697193
P0013760	Ithaca	70	70	23439	9541	2907	534	26717	12547	220	220	53353	22912	4775583
P0013136	Ithaca	63	63	22760	9417	2856	532	27264	12580	210	210	53153	22802	4604254
P0018606	Ithaca	66	66	26873	11185	3454	592	30178	14251	241	241	60812	26335	5530113
P0018602	Ithaca	65	65	25282	10320	3186	556	28947	13533	1530	1530	59010	26004	5218881
P0018615	Ithaca	34	34	24469	9973	3020	478	28343	12992	1504	1504	57370	24981	4304533
P0018609	Ithaca	62	62	23170	9572	2828	508	26378	12453	241	241	52679	22836	4703936
P0018617	Ithaca	70	70	23007	9487	2795	485	26747	12534	223	223	52842	22799	4673214
P0018616	Ithaca	62	62	23203	9469	2872	512	26621	12593	228	228	52986	22864	4756728
P0018613	Ithaca	66	66	23328	9551	2879	531	26859	12696	242	242	53374	23086	4698092
P0018010	Ithaca	95	95	23562	9732	3008	569	27478	12768	247	247	54390	23411	4799514
P0018009	Ithaca	92	92	22897	9453	2962	511	27929	12578	275	275	54155	22909	4741329
P0018008	Ithaca	110	110	23020	9440	2965	525	27832	12636	293	293	54220	23004	4807089
P0018624	Ithaca	76	76	23432	9479	2867	529	26599	12665	306	306	53280	23055	4746259
P0018623	Ithaca	94	94	23155	9488	2879	541	25968	12500	374	374	52470	22997	4653177
P0018622	Ithaca	93	93	23276	9478	2903	554	26194	12602	198	198	52664	22925	4801163
P0018603	Ithaca	54	54	21650	8782	2771	473	26550	12053	398	398	51423	21760	4324394
P0018580	Ithaca	80	80	22047	9059	2812	506	26837	12155	555	555	52331	22355	4405464
P0018581	Ithaca	88	88	22991	9466	2869	504	27785	12516	832	832	54565	23406	4566671
P0018579	Ithaca	87	87	22941	9396	2899	502	27453	12507	162	162	53542	22654	4709730
P0018777	Ithaca	84	84	23504	9668	2878	557	28354	13126	169	169	54989	23604	4797965
P0018778	Ithaca	44	44	16098	6398	1889	341	18333	8518	98	98	36462	15399	2881781
P0007329	Ithaca	33	33	22523	9185	2815	454	27438	12529	196	196	53005	22397	4611332
P0008632	Ithaca	61	61	22497	9244	2822	439	27528	12497	135	135	53043	22376	4768784
P0018774	Ithaca	87	87	23666	9720	2831	520	26805	12828	162	162	53551	23317	4811325
P0018780	Ithaca	90	90	23694	9728	2833	539	26352	12581	217	217	53186	23155	4756606
P0018781	Ithaca	75	75	23545	9595	2828	528	26563	12699	179	179	53190	23076	4773667
P0018773	Ithaca	98	98	23435	9567	2869	587	27441	12951	174	174	54017	23377	4786266
P0009975	Ithaca	88	88	23278	9502	2930	527	27525	12999	205	205	54026	23321	4781009
P0019211	Ithaca	75	75	23295	9666	2938	530	27540	12960	188	188	54036	23419	4738900
P0019212	Ithaca	80	80	23359	9544	2917	500	26828	12791	137	137	53321	23052	4794706
P0009906	Ithaca	80	80	23300	9557	2973	558	27165	12782	200	200	53718	23177	4819214
P0019331	Ithaca	76	76	23717	9867	2913	538	27270	12924	213	213	54189	23618	4720172
P0019332	Ithaca	80	80	23303	9548	2973	593	27154	12641	271	271	53781	23133	4782643
P0455281	NMD	77	77	22546	9200	2855	414	28515	12896	133	133	54126	22720	4718429
P0695060	NMD	60	60	22878	9362	2854	467	28202	12592	130	130	54124	22611	4595001
P0201185	NMD	44	44	22701	9244	2850	449	32546	12873	300	300	58441	22910	4600676
P0245209	NMD	57	57	22687	9259	2817	446	26483	12354	146	146	52190	22262	4794322
P0936700	NMD	97	97	23335	9343	2839	533	26841	12922	162	162	53274	23057	4852561
P0947867	NMD	80	80	23114	9325	2789	518	27083	12699	190	190	53256	22812	4741080
P0205230	NMD	89	89	23312	9414	2854	536	27102	12869	156	156	53513	23064	4796835
P0064419	NMD	31	31	22449	9111	2849	438	27442	12447	156	156	52927	22183	4675252
P0259783	NMD	112	112	22827	9181	2731	510	26418	12490	155	155	52243	22448	4713781
P0893495	NMD	107	107	23484	9487	2842	532	26508	12750	131	131	53072	23007	4835076
P0181081	NMD	100	100	23254	9310	2810	525	26429	12553	192	192	52785	22680	4789800
P0436361	NMD	75	75	22571	9168	2812	484	26895	12485	130	130	52483	22342	4792110
P0078963	NMD	53	53	22859	9210	2817	456	27008	12430	935	935	53672	23084	4663365
P0631224	NMD	81	81	23812	9731	3044	581	28656	13108	127	127	55720	23628	4898004
P0463592	NMD	73	73	23592	9757	2990	539	29030	12914	156	156	55841	23439	4795371
P0305830	NMD	86	86	23725	9602	2979	543	27407	12961	140	140	54337	23332	4883910
P0144374	Ithaca	50	50	22724	9372	2822	469	27792	12666	130	130	53518	22687	4678567
P0610589	Ithaca	34	34	22769	9352	2883	430	29823	12877	196	196	55705	22889	4654145
P0019609	Ithaca	58	58	22928	9362	2860	496	26790	12863	131	131	52767	22910	4887710
P0019610	Ithaca	48	48	23173	9443	2905	471	27874	12835	176	176	54176	22973	4856115
P0010030	Ithaca	85	85	23241	9398	2761	517	27445	12673	152	152	53684	22825	4787673
P0010149	Ithaca	69	69	23187	9470	2831	514	27470	12686	139	139	53696	22878	4730423
P0010150	Ithaca	90	90	23272	9406	2775	531	27742	12737	142	142	54021	22906	4787060
P0018770	Ithaca	80	80	23252	9505	2833	496	27601	12582	141	141	53907	22804	4778557
P0018771	Ithaca	91	91	23509	9672	2802	511	27553	12805	128	128	54083	23207	4764075
P0018772	Ithaca	98	98	23765	9693	2930	547	26638	12937	122	122	53553	23397	4862347
P0020327	Ithaca	98	98	23559	9633	2826	560	26668	12756	107	107	53258	23154	4845134
P0020328	Ithaca	103	103	23631	9540	2830	538	27379	12791	105	105	54048	23077	4873993
P0020329	Ithaca	89	89	23480	9542	2837	545	26847	12755	105	105	53358	23036	4798575
P0015601	RND	84	84	22730	9108	2792	492	31280	12663	854	854	57740	23201	4686282
P0016776	RND	95	95	22866	9191	2766	480	28042	12478	719	719	54488	22963	4676366
P0016777	RND	75	75	22334	8846	2781	472	29004	12401	649	649	54843	22443	4590514
P0018410	RND	112	112	23659	9501	2872	536	32011	13221	1685	1685	60339	25055	4829654
P0018411	RND	89	89	23373	9336	2842	524	30492	12510	2833	2833	59629	25292	4654492
P0018424	RND	97	97	23630	9414	2837	539	28985	12745	3128	3128	58677	25923	4775700
P0016131	RND	38	38	22650	9139	2831	459	29810	12829	229	229	55558	22694	4591866
P0018489	RND	48	48	22754	9109	2755	457	29016	12672	251	251	54824	22537	4692634
P0018492	RND	28	28	22312	8770	2637	374	149514	30602	268	268	174759	40042	4118471
P0018493	RND	57	57	22799	9156	2797	419	53638	15313	315	315	79606	25260	4562957
P0016344	RND	37	37	22571	9073	2869	439	31047	12775	292	292	56816	22616	4516303
P0018500	RND	50	50	22755	9084	2832	465	32280	13047	226	226	58143	22872	4621501
P0016368	RND	61	61	22783	9312	2799	442	29776	12896	204	204	55623	22915	4693198
P0018504	RND	46	46	22851	9202	2863	437	29376	12793	185	185	55321	22663	4648996
P0018996	RND	31	31	22655	9215	2861	473	28140	12849	125	125	53812	22693	4806528
P0019023	RND	66	66	22753	9190	2866	460	27925	12864	145	145	53755	22725	4842011
P0019024	RND	43	43	22367	9040	2838	429	30565	12739	151	151	55964	22402	4502990
P0019021	RND	36	36	22224	8840	2683	427	27590	12302	264	264	52797	21869	4496795
P0019025	RND	40	40	22814	9297	2882	468	29536	12752	150	150	55422	22707	4745816
P0019026	RND	57	57	22902	9286	2876	455	30340	12919	213	213	56388	22930	4773124
P0019022	RND	90	90	23186	9350	2824	521	28660	12745	209	209	54969	22915	4800834
P0019027	RND	99	99	23353	9567	2824	532	28111	12798	146	146	54533	23142	4797484
P0019028	RND	95	95	23221	9426	2848	551	29251	12797	170	170	55585	23039	4760535
P0002955	RND	58	58	22870	9298	2794	416	31306	12923	203	203	57231	22898	4514801
P0019030	RND	63	63	22813	9401	2785	444	28512	12916	163	163	54336	22987	4858342
P0016356	RND	70	70	22543	9160	2865	445	28390	12694	130	130	53998	22499	4789445
P0019033	RND	39	39	22719	9243	2826	479	32064	13243	214	214	57862	23218	4745300
P0016418	RND	64	64	22649	9190	2864	437	29186	12745	121	121	54884	22557	4817731
P0016417	RND	48	48	22595	9190	2857	456	29934	12928	193	193	55627	22815	4805000
P0001479	RND	58	58	22459	9318	2981	487	32963	13103	134	134	58595	23100	4773431
P0019043	RND	52	52	22440	9221	2958	460	28628	12619	138	138	54216	22490	4739706
P0003288	RND	48	48	22797	9311	2934	479	32635	13033	141	141	58555	23012	4797941
P0019044	RND	41	41	22724	9385	2910	478	31643	13212	179	179	57497	23295	4831150
P0003289	RND	47	47	22910	9429	2910	425	32044	13025	245	245	58156	23171	4703763
P0019049	RND	56	56	23006	9404	2911	448	28966	12961	154	154	55093	23023	4824856
P0011966	RND	51	51	23008	9530	2880	457	29239	13118	174	174	55352	23330	4879408
P0019037	RND	51	51	22836	9370	2897	428	36780	13541	152	152	62716	23542	4810038
P0382016	NMD	109	109	27409	10684	3664	648	32333	14770	135	135	63650	26346	4843360
P0752076	NMD	98	98	27044	10600	3678	593	32145	14623	131	131	63096	26045	4749086
P0480188	NMD	91	91	23353	9267	2855	544	27893	12927	113	113	54305	22942	4812837
P0537031 P0008100	Ithaca	46	46	22839	9273	2866	460	27883	12804	128	128	53762	22711	4850769
P0008178	NMD	53	53	22623	9161	2840	470	27501	12657	125	125	53142	22466	4736862
P0093587	NMD	61	61	22428	9121	2789	481	26411	12479	100	100	51789	22242	4798538
P0007362	NMD	84	84	22982	9374	2862	475	26873	12699	105	105	52906	22737	4861773
P0020628	NMD	75	75	23083	9348	2870	487	27089	12640	151	151	53268	22701	4826524
P0184206	Ithaca	78	78	23953	9841	2812	535	29660	13310	131	131	56634	23895	4845441
P0857946	Ithaca	112	112	27244	10691	3624	631	31672	14685	140	140	62792	26259	4802401
P0741865	Ithaca	84	84	27833	10870	3661	622	34222	15008	146	146	65946	26730	4872104
P0337002	NMD	47	47	22526	9205	2796	447	27964	12921	178	178	53511	22798	4789294
P0947219 P0719009	NMD	43	43	22936	9371	2849	460	28388	12989	167	167	54383	23030	4795740
P0021581	NMD	39	39	22721	9130	2759	434	29436	12902	327	327	55282	22832	4684243
P0863892	NMD	31	31	22748	9134	2820	471	29081	12896	501	501	55181	23033	4651679
P0245909	NMD	38	38	22522	9077	2792	449	28059	12687	355	355	53766	22606	4711152
P0847234	NMD	42	42	22810	9290	2770	442	28274	12852	362	362	54258	22988	4723183
P0850372	Ithaca	94	94	25167	10039	2914	553	27912	13382	155	155	56242	24223	5171304
P0640809	Ithaca	120	120	28865	11178	3770	657	32394	15107	149	149	65298	27211	5111621
P0405623	Ithaca	105	105	29571	11433	3750	598	33679	15356	173	173	67278	27665	5050017
P0018517	RND	46	46	23004	9389	2896	453	27428	12465	162	162	53536	22515	4741082
P0018518	RND	48	48	22739	9272	2856	462	28307	12725	181	181	54131	22688	4673517
P0149027	NMD	102	102	23729	9622	2816	563	25943	12735	114	114	52704	23136	4832822
P0434420	NMD	46	46	22771	9326	2794	435	27317	12674	116	116	53044	22597	4831159
P0313065	NMD	131	131	27448	10747	3622	650	30631	14585	157	157	61989	26270	4812982
P0187292	NMD	60	60	22959	9360	2857	440	27293	12796	128	128	53297	22784	4851900
P0450684	NMD	53	53	22733	9391	2846	494	27083	12799	139	139	52854	22876	4841551
P0884455	NMD	34	34	23278	9430	2834	473	27320	12809	258	258	53724	23004	4790085
P0664958	NMD	82	82	27644	10848	3625	656	31010	14695	155	155	62516	26436	4881557
P0008101	NMD	41	41	22927	9404	2899	498	26865	12822	105	105	52837	22870	4895316
P0008100 P0314102	NMD	75	75	22621	9178	2929	502	26845	12452	259	259	52729	22466	4766546
P0005845	NMD	94	94	24011	9695	2805	563	26472	13061	107	107	53489	23520	4894555
P0836790	NMD	116	116	27799	10815	3631	624	31386	14652	150	150	63082	26357	4864945
P0900431	NMD	123	123	27563	10799	3587	651	31026	14774	132	132	62431	26479	4869991
P0078276	NMD	57	57	23027	9332	2965	502	27057	12786	107	107	53213	22784	4909200
P0005862	NMD	108	108	23428	9478	2788	537	26533	12805	181	181	53038	23109	4775368
P0451778	NMD	127	127	27403	10757	3642	624	31359	14707	155	155	62686	26370	4881904
P0304817	NMD	49	49	23226	9477	2815	422	27794	12691	111	111	53995	22750	4806641
P0202949	NMD	114	114	27103	10728	3636	624	30765	14645	145	145	61763	26256	4844047
P0132886	NMD	63	63	22625	9197	2816	482	26326	12656	114	114	51944	22512	4841881
P0968240	NMD	89	89	23881	9685	2835	572	25988	13043	100	100	52893	23489	4924106
P0150962	NMD	113	113	27390	10791	3646	644	30844	14696	137	137	62130	26381	4890797
P0361151	NMD	104	104	27475	10947	3637	668	30684	14647	141	141	62041	26507	4854107
P0034119	NMD	95	95	23951	9695	2768	573	26375	13222	109	109	53298	23694	4866458
P0985747	NMD	131	131	27481	10712	3638	660	31248	14767	130	130	62628	26400	4876835
P0402350	NMD	110	110	27610	10778	3540	631	31063	14816	144	144	62467	26479	4802591
P0237528	NMD	102	102	23729	9684	2776	536	26525	12859	177	177	53309	23358	4843589
P0011716	RND	24	24	21923	8769	2734	441	28895	12088	644	644	54220	21966	3995706
P0018035	RND	26	26	22051	8550	2667	401	28269	11859	939	939	53952	21775	3874532
P0018664	RND	30	30	22583	9093	2770	454	28698	12570	210	210	54291	22357	4350989
P0011734	RND	43	43	22660	9132	2707	411	30714	12763	841	841	56965	23190	4637179
P0011735	RND	32	32	22129	8747	2712	408	29152	11898	1503	1503	55528	22588	4224476
P0011742	RND	33	33	22429	9047	2772	424	29062	12348	1032	1032	55328	22884	4360791
P0003276	RND	39	39	22551	9112	2789	443	28095	12569	1327	1327	54801	23490	4603285
P0018349	RND	24	24	19715	7642	2305	334	23892	10396	617	617	46553	19013	2884645
P0018350	RND	27	27	23249	9481	2852	443	37078	13441	1256	1256	64462	24648	4604920
P0011758	RND	41	41	22877	9253	2814	440	29479	12846	1161	1161	56372	23741	4700830
P0011759	RND	29	29	23040	9452	2779	457	29044	12950	440	440	55332	23328	4769945
P0011769	RND	25	25	20784	8135	2474	306	40658	11982	3320	3320	67261	23768	3476460
P0011770	RND	29	29	21033	8437	2422	343	38764	12073	2336	2336	64584	23218	3340733
P0011781	RND	38	38	23054	9379	2776	459	29730	12982	405	405	56003	23263	4658434
P0011782	RND	46	46	22935	9270	2827	479	29404	12623	1063	1063	56275	23481	4644011
P0011783	RND	60	60	22847	9209	2825	499	34330	13239	1173	1173	61235	24180	4715581
P0011784	RND	43	43	22860	9184	2842	476	38286	13742	1325	1325	65356	24770	4666654
P0011788	RND	56	56	23201	9322	2816	419	29050	12968	534	534	55657	23299	4798351
P0011789	RND	54	54	22570	8988	2719	439	33820	12754	1373	1373	60536	23608	4336542
P0016165	RND	47	47	23192	9503	2785	440	28134	13024	381	381	54539	23395	4864095
P0016174	RND	58	58	23054	9382	2806	459	30385	13128	457	457	56760	23484	4781149
P0018356	RND	56	56	23077	9494	2832	475	27717	12859	269	269	53951	23153	4848662
P0015968	RND	13	13	13778	5264	1606	214	16144	6981	787	787	32328	13259	1250291
P0015973	RND	42	42	23342	9377	2799	455	30067	12978	590	590	56840	23442	4698554
P0003290	RND	17	17	20971	8162	2523	374	27977	11126	2717	2717	54205	22396	3357043
P0011838	RND	47	47	23820	9529	2796	438	30667	13164	1015	1015	58345	24193	4715640
P0003275	RND	62	62	23060	9442	2824	459	27335	12750	517	517	53798	23230	4853903
P0011853	RND	43	43	23118	9227	2864	468	32638	13041	901	901	59564	23680	4646252
P0018359	RND	44	44	22950	9377	2871	435	30757	12990	575	575	57197	23421	4695920
P0015996	RND	44	44	22893	9261	2770	437	27660	12964	706	706	54073	23412	4832731
P0018694	RND	51	51	22965	9348	2807	476	27660	12951	807	807	54290	23633	4805951
P0011878	RND	27	27	23355	9271	2781	418	31882	13015	1314	1314	59359	24045	4358304
P0018364	RND	34	34	23319	9412	2815	455	30901	13057	1290	1290	58359	24248	4626087
P0003273	RND	41	41	23040	9319	2839	464	30757	12942	2039	2039	58716	24805	4634668
P0018371	RND	36	36	23157	9326	2860	462	27812	12999	433	433	54298	23256	4812426
P0016216	RND	31	31	23021	9369	2822	431	30720	12923	708	708	57302	23462	4641544
P0016217	RND	38	38	23350	9302	2836	437	29566	12829	1356	1356	57146	23962	4578915
P0018397	RND	48	48	22975	9311	2906	470	29062	13017	426	426	55417	23272	4772466
P0019146	RND	43	43	23015	9353	2871	484	27112	12909	129	129	53170	22918	4910980
P0018430	RND	28	28	22616	9050	2761	444	30290	12555	1557	1557	57252	23634	4262402
P0020839	RND	39	39	22886	9256	2854	456	27330	12738	195	195	53304	22684	4869530
P0011744	RND	62	62	23125	9379	2801	457	31029	12941	1254	1254	58271	24093	4736369
P0551292	RND	26	26	21627	8572	2504	357	28829	11715	1752	1752	54738	22422	3643881
P0859417	RND	47	47	23321	9291	2921	470	35978	13616	686	686	62953	24110	4831936
P0016160	RND	34	34	23032	9239	2812	437	28810	12760	662	662	55350	23132	4313063
P0011848	RND	40	40	23096	9338	2722	409	29814	12624	2262	2262	57934	24673	4384058
P0020304	RND	38	38	22918	9304	2815	458	30642	12950	1279	1279	57692	24029	4591059
P0020381	RND	46	46	23024	9332	2914	484	28418	12861	391	391	54793	23114	4810605
P0020382	RND	55	55	23159	9549	2934	488	28592	13006	406	406	55146	23504	4809509
P0276815	RND	39	39	22808	9119	2754	431	30364	12507	2865	2865	58830	24961	4242687
P0958540	NMD	89	89	23845	9679	2805	533	27972	12884	495	495	55206	23680	4818366
P0460777	NMD	77	77	23541	9553	2747	514	28803	13229	331	331	55499	23704	4758433
P0259258	NMD	40	40	23020	9428	2925	486	27897	12893	114	114	53996	22961	4793260
P0849824	NMD	57	57	22908	9305	2916	463	27285	12640	110	110	53276	22575	4855434
P0591545	NMD	29	29	20805	8247	2530	353	24883	10903	190	190	48437	19722	3505828
P0018415	NMD	108	108	23547	9547	2811	524	27450	12813	679	679	54595	23671	4829309
P0018419	NMD	42	42	22987	9182	2866	466	28105	12457	1758	1758	55758	23905	4624922
P0519408	NMD	90	90	23825	9646	2797	514	27289	12878	861	861	54862	23989	4867366
P0018416	NMD	92	92	22587	8844	2737	479	26476	11703	1612	1612	53504	22730	4448149
P0018417	NMD	22	22	21409	8299	2507	374	25843	11190	1539	1539	51320	21424	3470397
P0018469	NMD	12	12	14995	5760	1804	254	17503	7741	582	582	34896	14349	1649404
P0238669	NMD	50	50	22810	9141	2801	454	27262	12019	1006	1006	53929	22670	4567315
P0737800	NMD	85	85	24000	9785	2882	537	33684	13535	2153	2153	62804	26095	4884156
P0065591	NMD	82	82	23016	9313	2725	510	27222	12583	988	988	54033	23476	4670370
P0500826	NMD	84	84	23891	9635	2875	503	28649	12840	2007	2007	57506	25069	4879674
P0018472	NMD	107	107	23882	9666	2853	534	27624	12994	1124	1124	55590	24425	4838333
P0018532	NMD	83	83	23804	9556	2831	518	28261	13002	692	692	55671	23851	4875142
P0018533	NMD	116	116	23946	9728	2899	536	28298	12852	1021	1021	56280	24253	4853286
P0018481	NMD	113	113	23069	9338	2734	526	27006	12686	863	863	53785	23526	4713936
P0411197	NMD	102	102	23652	9455	2788	505	27993	12860	1503	1503	56038	24425	4837896
P0339838	NMD	108	108	23852	9647	2874	555	26931	12974	613	613	54378	23897	4886415
P0018473	NMD	76	76	22853	9365	2882	446	29479	12935	1499	1499	56789	24321	4766430
P0018568	NMD	73	73	22854	9306	2903	456	30152	13070	1404	1404	57386	24309	4805611
P0018565	NMD	57	57	23127	9503	2964	484	29587	12985	1079	1079	56814	24108	4788845
P0896861	NMD	72	72	22708	9276	2874	478	28514	12981	1110	1110	55278	23917	4842735
P0012351	NMD	78	78	23172	9321	2870	469	36700	13439	2047	2047	64867	25354	4762780
P0410957	Epicare	74	74	21547	8607	2683	480	25814	11709	158	158	50276	21028	4453657
P0590943	Epicare	94	94	23512	9513	2867	551	26753	12902	111	111	53337	23171	4854051
P0569527	Epicare	99	99	23458	9645	2852	511	27069	12942	125	125	53603	23322	4801765
P0977091	Epicare	94	94	23762	9566	2745	551	26429	12906	116	116	53146	23233	4902495
P0701930	Epicare	101	101	23923	9764	2784	567	26128	12935	128	128	53064	23495	4886883
P0840247	Epicare	87	87	23761	9731	2653	501	26245	13100	117	117	52863	23536	4853019
P0844990	Epicare	91	91	24028	9913	2741	547	26355	12939	114	114	53329	23604	4866820
P0654592	Epicare	90	90	24050	9696	2740	541	26651	12783	110	110	53641	23220	4869520
P0414188	Epicare	92	92	23770	9671	2755	523	26953	13007	135	135	53705	23428	4826882
P0931331	Epicare	98	98	23832	9734	2793	565	26870	12916	155	155	53748	23468	4864545
P0250627	Epicare	101	101	23949	9657	2863	555	27225	12965	154	154	54292	23432	4851745
P0711053	Epicare	82	82	23602	9552	2747	556	26825	12650	162	162	53418	23002	4786329
P0931200	Epicare	94	94	23814	9661	2787	564	26244	12915	126	126	53065	23360	4879253
P0780205	Epicare	88	88	23570	9493	2769	531	27060	12850	158	158	53645	23120	4816795
P0846061	Epicare	102	102	23707	9650	2847	557	27110	12885	118	118	53884	23312	4810794
P0019029	RND	78	78	22751	9224	2818	453	28103	12712	571	571	54321	23038	4785791
P0019032	RND	57	57	22742	9100	2815	442	29467	12854	668	668	55749	23121	4718855
P0143230	RND	46	46	23333	9448	2811	443	31246	13026	909	909	58345	23872	4628137
P0749157	Epicare	92	92	24318	9804	2939	557	28463	13154	192	192	56004	23799	4918250
P0980161	Epicare	81	81	23755	9532	2885	546	28353	13053	175	175	55249	23387	4816903
P0270361	Epicare	82	82	24199	9791	2943	572	27951	13122	161	161	55336	23728	4934509
P0252261	Epicare	88	88	23600	9635	2901	533	27514	13036	159	159	54262	23451	4849169
P0803871	Epicare	97	97	23758	9659	2921	525	27863	13205	124	124	54763	23610	4827576
P0858235	Epicare	76	76	22113	8575	2611	446	35778	12487	579	579	61157	22163	4233467
P0814199	Ithaca	110	110	24089	9768	2792	533	26408	13035	123	123	53522	23569	4898571
P0498201	Ithaca	108	108	24298	9938	2806	527	26312	13047	125	125	53649	23745	4912848
P0059261	Ithaca	93	93	23728	9509	2849	542	27028	12951	147	147	53845	23242	4884744
P0596717	Ithaca	104	104	24120	9739	2738	540	25921	12903	123	123	53006	23409	4936898
P0122128	Ithaca	94	94	23774	9610	2712	531	25895	12783	134	134	52609	23152	4901332
P0278916	Ithaca	120	120	23895	9714	2781	551	26759	13066	122	122	53677	23573	4823611
P0018512	Ithaca	111	111	23913	9586	2847	527	26263	12844	132	132	53266	23200	4941390
P0018513	Ithaca	103	103	23912	9686	2736	507	25831	12882	126	126	52708	23304	4850883
P0018514	Ithaca	108	108	24184	9676	2828	523	26524	12955	205	205	53849	23467	4922277
P0113077	Ithaca	99	99	23920	9674	2752	554	27570	13128	132	132	54473	23587	4864453
P0874601	Ithaca	87	87	23778	9635	2783	552	26940	12944	129	129	53717	23347	4821735
P0185634	Ithaca	106	106	23790	9662	2763	533	27124	13132	117	117	53900	23550	4880878
P0058823	Ithaca	90	90	23884	9611	2850	574	26479	12974	110	110	53413	23359	4910673
P0130556	Ithaca	96	96	23844	9719	2787	557	26162	12822	116	116	53005	23310	4839206
P0057486	Ithaca	85	85	23835	9597	2775	518	26432	12898	116	116	53243	23214	4870737
P0450193	Ithaca	109	109	23846	9636	2720	534	26011	12820	103	103	52789	23202	4860512
P0828106	Ithaca	110	110	23835	9524	2765	530	26533	13003	119	119	53362	23286	4874711
P0273321	Ithaca	97	97	23809	9684	2678	538	26433	12766	111	111	53128	23196	4808046
P0744295	Ithaca	107	107	24066	9850	2818	575	27400	13245	128	128	54519	23905	4911128
P0872686	Ithaca	108	108	23984	9819	2840	525	27567	13148	118	118	54617	23718	4867897
P0903803	Ithaca	96	96	23940	9717	2818	562	27234	13033	124	124	54212	23532	4905567
P0980478	Ithaca	108	108	23893	9575	2735	525	25559	12655	108	108	52403	22971	4909957
P0640751	Ithaca	98	98	24025	9655	2731	540	25811	12781	116	116	52781	23190	4854180
P0182871	Ithaca	107	107	23907	9504	2723	509	25657	12532	139	139	52533	22791	4872350
P0873282	NMD	67	67	22783	9161	2799	459	27107	12609	99	99	52855	22395	4860025
P0198522	NMD	29	29	22759	9249	2869	470	28087	12610	115	115	53859	22473	4770125
P0679250	NMD	33	33	22647	9163	2839	438	27719	12787	115	115	53353	22536	4840283
P0005855	NMD	50	50	22972	9276	2855	476	28134	12769	119	119	54130	22690	4858124
P0266464	NMD	84	84	23055	9303	2859	470	28426	12620	130	130	54554	22607	4776082
P0018619	Ithaca	44	44	22880	9367	2972	474	29004	12869	236	236	55136	22990	4727232
P0019101	RND	94	94	24017	9787	2840	522	28174	13115	159	159	55284	23677	4899329
P0019100	RND	102	102	23817	9674	2879	526	28178	13088	122	122	55098	23512	4864007
P0019102	RND	91	91	23818	9557	2827	533	27946	13013	119	119	54801	23313	4845696
P0008963	NMD	68	68	22867	9276	2846	438	26977	12756	115	115	52873	22653	4896835
P0365571	NMD	68	68	23276	9495	2817	472	27271	12813	125	125	53557	22973	4844795
P0335994	NMD	48	48	23103	9414	2900	479	28842	12974	129	129	55022	23044	4820511
P0657753	NMD	72	72	22729	9236	2850	464	27756	12489	2013	2013	55420	24274	4718573
P0537419	Ithaca	96	96	24937	10073	2899	529	28802	13390	172	172	56906	24260	5076990
P0185637	Ithaca	107	107	25045	10105	2925	525	29446	13503	190	190	57713	24430	5126777
P0946542	Ithaca	40	40	24233	9855	3077	478	30670	13419	200	200	58220	23992	5027640
P0669924	Ithaca	96	96	25423	10359	2902	536	28761	13522	167	167	57349	24680	5074055
#N/A		73	73	23172	9417	2837	496	27893	12854	181	181	54258	23202	4797484
#N/A		71	70.9454	23342.7	9440.56	2862.7	496.778	28926.1	12920.6	455.887	455.887	55658.3	23384.8	4.7005e+06

## Sheet: Legend
Number of structural variant calls for all participants in the study cohort. Abbreviations: BND: break end calls, DEL: deletions, INV: inversions, DUP: duplications, INS: insertions. Last 2 rows in the table summarize the data by their median and mean.
