# Supplementary material for: Unraveling undiagnosed rare disease cases by HiFi long-read genome sequencing
Source: HighWire-hosted journal article supplement (doi:10.1101/gr.279414.124), 2025-03-26
Supplement: Supplemental_Table_S4.xlsx [file Supplemental_Table_S4.xlsx]

## Sheet: Table
Child Participant ID	Family ID	Nr Of identified putative de novo SV calls	Nr Of filtered putative de novo SV calls	Visually curated SV calls	Successful primer design	Nr Of Uniq SVs
P0631224	W21-1211	48	15	2	2	2
P0596717	W21-1309	47	12	2	2	2
P0931331	W22-1813	40	10	2	2	1
P0744295	W22-2276	51	17	1	1	1
P0018512	W21-0223	38	9	1	1	1
P0018472	W22-1744	33	10	1	1	1
P0737800	W22-1743	21	11	3	2	1
P0980478	W22-2277	59	18	6	4	3
P0850372	W21-2250	44	11	1	0	0
P0034119	W21-2132	44	12	1	0	0
P0184206	W21-2200	39	6	1	0	0
P0252261	W22-1929	17	5	1	0	0
P0977091	W22-1811	32	5	1	1	1
P0185637	W21-0301	31	10	1	1	1
P0018622	W20-0288	29	10	1	1	1
P0450193	W22-2275	45	12	2	0	0
P0020327	W21-1377	42	11	1	0	0
P0814199	W21-1297	50	21	3	1	1
P0936700	W21-1205	30	3	2	1	1
P0018579	W20-0899	20	12	1	1	1
P0931200	W22-1814	51	12	0	0	0
P0018481	W22-1745	42	12	0	0	0
P0009906	W20-0894	41	8	0	0	0
P0058823	W22-2274	41	16	0	0	0
P0844990	W22-1812	40	9	0	0	0
P0968240	W21-2080	39	7	0	0	0
P0113077	W22-2273	38	6	0	0	0
P0012598	W19-0933	33	2	0	0	0
P0749157	W22-1928	33	9	0	0	0
P0017591	W08-0526	30	5	0	0	0
P0018008	W19-1675	30	2	0	0	0
P0009975	W20-0896	30	5	0	0	0
P0018774	W20-0900	29	8	0	0	0
P0259783	W21-1208	27	8	0	0	0
P0018770	W21-1376	21	4	0	0	0
P0480188	W21-2068	21	5	0	0	0
P0010030	W21-1374	20	5	0	0	0
P0018602	W18-1254	15	6	0	0	0
P0018609	W13-1002	11	4	0	0	0
P0018614	W08-1567	10	2	0	0	0
P0410957	W22-1810	5	0	0	0	0
P0018773	W20-0897	4	2	0	0	0

## Sheet: Legend
numbers of putative de novo SVs. Column A indicates the participant identifier for the child in each of the 42 parent-offspring trios that are part of the study cohort, column B represents the family identifier. Column C shows the number of putative de novo SVs called per trio (with the number of HiFi reads for all three family members being 8 or more, and the number of HiFi reads supporting the …
