# Supplementary material for: Unraveling undiagnosed rare disease cases by HiFi long-read genome sequencing
Source: HighWire-hosted journal article supplement (doi:10.1101/gr.279414.124), 2025-03-26
Supplement: Supplemental_Table_S5.xlsx [file Supplemental_Table_S5.xlsx]

## Sheet: Table
Child Participant ID	Family ID	SV_chrom	SV_start	SV_end	SV_length	Primer_pair	SV_type	Exclusion/result
P0018472	W22-1744	4	49512690	49512760	-70	1	DEL	Inherited
P0018512	W21-0223	6	55650110	55650140	-30	2	DEL	Inherited
P0018579	W20-0899	16	1761667	1761668	22	3	INS	True de novo
P0018622	W20-0288	X	135426509	135426542	-33	4	DEL	Parental sequencing failed
P0185637	W21-0301	11	120328653	120329132	479	5	DUP	Parental sequencing failed
P0596717	W21-1309	7	61923163	61923186	-23	6	DEL	False positive
P0596717	W21-1309	7	61051789	61051790	127	7	INS	False positive
P0631224	W21-1211	9	64971168	64971339	-171	8	DEL	False positive
P0631224	W21-1211	13	60649293	60649294	46	9	INS	False positive
P0737800	W22-1743	5	3659931	3660275	344	10	DUP	Inherited
P0737800	W22-1743	5	3659974	3659975	805	10	INS	Inherited
P0744295	W22-2276	10	126251497	126252183	686	11	DUP	Inherited
P0814199	W21-1297	2	239712197	239714241	-2044	12	DEL	True de novo
P0931331	W22-1813	3	91529188	91529358	-170	13	DEL	False positive
P0931331	W22-1813	3	91529724	91529747	-23	13	DEL	False positive
P0936700	W21-1205	X	139164887	139679311	500000	14	DUP	True de novo
P0977091	W22-1811	6	161368287	161368309	-22	15	DEL	Parental sequencing failed
P0980478	W22-2277	2	206490896	206490923	-27	16	DEL	Inherited
P0980478	W22-2277	7	12485326	12485906	580	17	DUP	Inherited
P0980478	W22-2277	9	135383413	135386665	-3252	18	DEL	True de novo
P0980478	W22-2277	9	135386675	135386852	-177	18	DEL	True de novo

## Sheet: Legend
Overview of validations for which PCR primers were designed. 18 pairs of primers were successfully designed for validation of putative de novo variants. Columns C-E indicate the genomic location of the variants relative to hg38. The 18 primer pairs cover 21 SV calls, it is indicated in column G which primer pairs cover 2 adjacent SVs.
