# Supplementary material for: Unraveling undiagnosed rare disease cases by HiFi long-read genome sequencing
Source: HighWire-hosted journal article supplement (doi:10.1101/gr.279414.124), 2025-03-26
Supplement: Supplemental_Table_S6.xlsx [file Supplemental_Table_S6.xlsx]

## Sheet: Table
Participant ID	NrOfReads	Fraction_0	Fraction_1	Fraction_2	Fraction_3	Fraction_4	Fraction_5	Fraction_6	Fraction_7	Fraction_8	Fraction_9	Fraction_10	Mean
P0017591	2025002	1	0.92	0.91	0.91	0.89	0.87	0.83	0.77	0.7	0.6	0.5	9.63
P0017592	2093651	1	0.92	0.92	0.91	0.9	0.88	0.85	0.8	0.73	0.65	0.55	10.16
P0017593	1631006	1	0.93	0.91	0.89	0.86	0.81	0.75	0.67	0.58	0.49	0.4	9.06
P0018614	1652771	1	0.93	0.92	0.9	0.88	0.84	0.78	0.71	0.62	0.51	0.41	8.93
P0018599	915631	1	0.91	0.88	0.82	0.72	0.58	0.43	0.3	0.19	0.11	0.06	5.32
P0012598	1165127	1	0.92	0.91	0.88	0.83	0.75	0.66	0.55	0.43	0.32	0.23	7.3
P0013760	2032641	1	0.92	0.91	0.9	0.89	0.86	0.83	0.77	0.69	0.6	0.5	9.61
P0013136	1228452	1	0.92	0.91	0.88	0.83	0.77	0.67	0.56	0.44	0.33	0.23	7.29
P0018606	1691118	1	0.93	0.92	0.9	0.87	0.83	0.77	0.68	0.59	0.48	0.38	8.63
P0018602	1161104	1	0.92	0.9	0.87	0.8	0.71	0.59	0.45	0.32	0.22	0.14	6.34
P0018615	1130926	1	0.91	0.88	0.8	0.69	0.54	0.39	0.26	0.16	0.1	0.05	5.11
P0018609	1274470	1	0.92	0.91	0.89	0.85	0.79	0.71	0.61	0.49	0.38	0.28	7.66
P0018617	1753348	1	0.93	0.92	0.9	0.87	0.83	0.77	0.7	0.6	0.5	0.4	8.82
P0018616	1769841	1	0.92	0.91	0.9	0.89	0.86	0.81	0.75	0.66	0.56	0.46	9.22
P0018613	1523676	1	0.92	0.91	0.9	0.88	0.84	0.78	0.7	0.6	0.48	0.37	8.48
P0018010	1778696	1	0.92	0.91	0.9	0.89	0.86	0.82	0.75	0.67	0.57	0.46	9.33
P0018009	1731455	1	0.93	0.91	0.9	0.87	0.82	0.75	0.67	0.57	0.46	0.36	8.38
P0018008	1634785	1	0.92	0.91	0.89	0.86	0.81	0.74	0.64	0.53	0.41	0.3	7.94
P0018624	1738294	1	0.92	0.91	0.9	0.88	0.85	0.79	0.72	0.62	0.51	0.4	8.81
P0018623	1796246	1	0.93	0.91	0.88	0.84	0.78	0.7	0.6	0.49	0.39	0.29	7.97
P0018622	1991223	1	0.92	0.91	0.91	0.89	0.87	0.82	0.76	0.68	0.59	0.48	9.48
P0018603	906544	1	0.92	0.88	0.8	0.69	0.55	0.41	0.28	0.17	0.1	0.06	5.17
P0018580	1219385	1	0.92	0.88	0.82	0.72	0.6	0.47	0.35	0.25	0.17	0.11	5.75
P0018581	1310537	1	0.92	0.89	0.85	0.78	0.67	0.55	0.43	0.32	0.22	0.15	6.42
P0018579	1370619	1	0.92	0.9	0.87	0.82	0.73	0.62	0.5	0.37	0.26	0.17	6.74
P0018777	2070343	1	0.93	0.92	0.91	0.9	0.89	0.86	0.83	0.78	0.72	0.65	11.47
P0018778	308079	1	0.73	0.46	0.25	0.12	0.06	0.03	0.01	0.01	0	0	1.79
P0007329	1578392	1	0.92	0.91	0.9	0.87	0.83	0.77	0.69	0.59	0.49	0.39	8.9
P0008632	2176382	1	0.92	0.91	0.91	0.9	0.87	0.84	0.79	0.72	0.63	0.53	9.93
P0018774	1770379	1	0.93	0.92	0.91	0.89	0.86	0.82	0.77	0.69	0.61	0.51	9.78
P0018780	1870219	1	0.93	0.92	0.9	0.88	0.84	0.79	0.72	0.63	0.53	0.42	8.92
P0018781	1745236	1	0.92	0.91	0.9	0.89	0.86	0.81	0.75	0.66	0.56	0.46	9.36
P0018773	2248210	1	0.93	0.92	0.91	0.9	0.89	0.86	0.83	0.79	0.73	0.66	11.55
P0009975	1459865	1	0.92	0.91	0.9	0.88	0.84	0.78	0.7	0.6	0.49	0.37	8.65
P0019211	1684943	1	0.93	0.92	0.9	0.88	0.84	0.79	0.72	0.63	0.53	0.43	9.18
P0019212	2050765	1	0.92	0.92	0.91	0.9	0.88	0.84	0.79	0.73	0.64	0.54	10.17
P0009906	1583402	1	0.92	0.91	0.9	0.89	0.86	0.82	0.76	0.67	0.57	0.47	9.39
P0019331	1390388	1	0.93	0.92	0.9	0.87	0.83	0.77	0.69	0.59	0.49	0.39	8.73
P0019332	1827311	1	0.92	0.92	0.91	0.89	0.86	0.82	0.76	0.68	0.59	0.49	9.78
P0455281	1976147	1	0.93	0.92	0.91	0.89	0.86	0.82	0.77	0.7	0.61	0.52	9.93
P0695060	1644271	1	0.93	0.91	0.89	0.86	0.81	0.74	0.65	0.54	0.44	0.33	8.18
P0201185	1695828	1	0.93	0.91	0.89	0.86	0.82	0.76	0.69	0.61	0.52	0.43	8.95
P0245209	2159526	1	0.93	0.92	0.91	0.89	0.87	0.84	0.79	0.74	0.67	0.59	10.61
P0936700	1827618	1	0.92	0.91	0.9	0.89	0.87	0.84	0.79	0.72	0.64	0.55	9.97
P0947867	1732729	1	0.93	0.91	0.9	0.87	0.83	0.78	0.7	0.62	0.52	0.42	8.86
P0205230	1786579	1	0.92	0.91	0.9	0.89	0.86	0.82	0.77	0.69	0.6	0.49	9.51
P0064419	1722921	1	0.93	0.92	0.9	0.88	0.84	0.79	0.73	0.65	0.55	0.46	9.25
P0259783	1857677	1	0.93	0.92	0.9	0.88	0.84	0.79	0.72	0.64	0.54	0.44	9.07
P0893495	2144121	1	0.93	0.92	0.91	0.89	0.87	0.84	0.79	0.73	0.65	0.56	10.18
P0181081	1955950	1	0.92	0.91	0.9	0.89	0.86	0.83	0.77	0.7	0.61	0.5	9.45
P0436361	2330767	1	0.93	0.92	0.91	0.9	0.88	0.85	0.81	0.76	0.69	0.61	10.84
P0078963	1772671	1	0.93	0.91	0.9	0.87	0.82	0.75	0.67	0.56	0.45	0.35	8.26
P0631224	1632599	1	0.93	0.92	0.91	0.89	0.86	0.82	0.76	0.69	0.6	0.51	9.85
P0463592	1474444	1	0.93	0.91	0.9	0.87	0.82	0.76	0.67	0.57	0.46	0.36	8.29
P0305830	1817647	1	0.92	0.91	0.91	0.89	0.87	0.83	0.78	0.7	0.61	0.51	9.61
P0144374	1663278	1	0.93	0.92	0.9	0.88	0.84	0.79	0.71	0.62	0.52	0.41	8.92
P0610589	1559655	1	0.92	0.91	0.9	0.88	0.84	0.78	0.69	0.58	0.47	0.36	8.4
P0019609	2204962	1	0.93	0.92	0.92	0.91	0.9	0.88	0.86	0.82	0.78	0.73	12.86
P0019610	1845845	1	0.92	0.92	0.91	0.9	0.88	0.86	0.82	0.76	0.69	0.6	10.67
P0010030	1647016	1	0.92	0.91	0.9	0.88	0.84	0.78	0.69	0.59	0.48	0.37	8.53
P0010149	1840563	1	0.93	0.92	0.91	0.89	0.86	0.82	0.76	0.68	0.6	0.5	9.73
P0010150	1801733	1	0.92	0.91	0.9	0.89	0.86	0.81	0.74	0.65	0.55	0.44	9.15
P0018770	1570736	1	0.93	0.92	0.9	0.87	0.83	0.77	0.7	0.6	0.5	0.39	8.78
P0018771	1732962	1	0.93	0.92	0.91	0.89	0.86	0.81	0.75	0.67	0.58	0.48	9.56
P0018772	2114536	1	0.92	0.92	0.91	0.91	0.9	0.88	0.86	0.83	0.78	0.71	12.03
P0020327	2147877	1	0.93	0.92	0.91	0.9	0.88	0.86	0.82	0.77	0.7	0.62	11.03
P0020328	2282484	1	0.92	0.92	0.91	0.9	0.89	0.87	0.83	0.78	0.71	0.62	10.77
P0020329	2246236	1	0.93	0.92	0.92	0.9	0.89	0.86	0.83	0.79	0.73	0.65	11.45
P0015601	1641680	1	0.92	0.9	0.88	0.83	0.77	0.68	0.57	0.46	0.35	0.25	7.27
P0016776	1826888	1	0.92	0.91	0.89	0.86	0.82	0.75	0.68	0.59	0.5	0.4	8.69
P0016777	1514350	1	0.92	0.9	0.87	0.82	0.75	0.65	0.55	0.44	0.33	0.24	7.07
P0018410	1864873	1	0.92	0.91	0.9	0.88	0.85	0.8	0.73	0.64	0.53	0.43	8.87
P0018411	1745142	1	0.92	0.91	0.88	0.84	0.77	0.69	0.6	0.49	0.39	0.29	7.63
P0018424	2129101	1	0.92	0.91	0.9	0.88	0.85	0.81	0.75	0.68	0.59	0.49	9.44
P0016131	1652891	1	0.93	0.91	0.89	0.86	0.81	0.74	0.65	0.54	0.43	0.32	8.04
P0018489	1846356	1	0.92	0.91	0.9	0.88	0.84	0.79	0.71	0.61	0.5	0.38	8.59
P0018492	1181294	1	0.91	0.88	0.83	0.75	0.64	0.52	0.4	0.28	0.19	0.12	5.96
P0018493	1797230	1	0.93	0.91	0.89	0.86	0.8	0.73	0.64	0.53	0.42	0.32	8
P0016344	1476594	1	0.92	0.91	0.89	0.84	0.78	0.7	0.6	0.49	0.38	0.28	7.62
P0018500	1781760	1	0.92	0.91	0.9	0.87	0.83	0.77	0.69	0.59	0.48	0.37	8.39
P0016368	1868849	1	0.93	0.92	0.9	0.88	0.85	0.8	0.74	0.65	0.56	0.46	9.21
P0018504	1701304	1	0.92	0.91	0.9	0.87	0.83	0.77	0.68	0.58	0.46	0.35	8.29
P0018996	2134000	1	0.93	0.92	0.91	0.9	0.88	0.85	0.82	0.77	0.7	0.62	11.01
P0019023	2151874	1	0.92	0.92	0.91	0.9	0.89	0.86	0.83	0.77	0.7	0.61	10.75
P0019024	1571132	1	0.92	0.91	0.88	0.84	0.78	0.7	0.59	0.48	0.37	0.27	7.66
P0019021	1511539	1	0.92	0.9	0.88	0.84	0.77	0.69	0.58	0.47	0.36	0.26	7.44
P0019025	1826545	1	0.92	0.91	0.9	0.89	0.86	0.81	0.74	0.65	0.54	0.43	9.03
P0019026	1897532	1	0.92	0.91	0.91	0.89	0.87	0.82	0.76	0.68	0.58	0.47	9.39
P0019022	1582103	1	0.92	0.91	0.9	0.87	0.83	0.76	0.68	0.57	0.46	0.35	8.28
P0019027	2146299	1	0.93	0.92	0.91	0.9	0.87	0.84	0.8	0.74	0.66	0.57	10.42
P0019028	2264356	1	0.92	0.91	0.91	0.89	0.87	0.83	0.77	0.68	0.58	0.47	9.35
P0002955	1599290	1	0.93	0.91	0.89	0.85	0.79	0.71	0.6	0.49	0.38	0.27	7.68
P0019030	2136396	1	0.92	0.91	0.91	0.9	0.89	0.87	0.84	0.79	0.73	0.66	11.33
P0016356	2039722	1	0.92	0.91	0.91	0.9	0.88	0.85	0.8	0.74	0.65	0.55	10.09
P0019033	1802619	1	0.93	0.92	0.91	0.89	0.86	0.82	0.76	0.69	0.6	0.5	9.69
P0016418	2251491	1	0.92	0.92	0.91	0.9	0.88	0.86	0.82	0.76	0.68	0.59	10.46
P0016417	2161891	1	0.93	0.92	0.91	0.9	0.87	0.84	0.8	0.74	0.66	0.58	10.44
P0001479	2167303	1	0.93	0.92	0.91	0.9	0.88	0.84	0.8	0.74	0.67	0.58	10.53
P0019043	2223842	1	0.93	0.92	0.91	0.89	0.86	0.82	0.77	0.69	0.6	0.5	9.67
P0003288	2141541	1	0.93	0.92	0.91	0.89	0.86	0.82	0.76	0.69	0.6	0.5	9.61
P0019044	2042987	1	0.93	0.92	0.91	0.89	0.87	0.83	0.78	0.71	0.62	0.53	10
P0003289	1646928	1	0.93	0.91	0.9	0.87	0.83	0.77	0.69	0.59	0.49	0.38	8.57
P0019049	2019501	1	0.93	0.92	0.91	0.89	0.87	0.83	0.78	0.71	0.63	0.53	9.98
P0011966	2001654	1	0.93	0.92	0.91	0.9	0.87	0.84	0.79	0.73	0.66	0.58	10.5
P0019037	2075468	1	0.92	0.91	0.91	0.9	0.88	0.85	0.8	0.73	0.64	0.54	10
P0382016	1940803	1	0.92	0.91	0.91	0.89	0.87	0.84	0.79	0.72	0.63	0.53	9.86
P0752076	1908555	1	0.93	0.92	0.91	0.89	0.85	0.81	0.74	0.66	0.57	0.46	9.32
P0480188	1621422	1	0.92	0.91	0.9	0.87	0.83	0.76	0.67	0.56	0.45	0.33	8.18
P0537031	1969523	1	0.92	0.92	0.91	0.9	0.89	0.87	0.83	0.78	0.71	0.62	10.86
P0008178	1945154	1	0.93	0.92	0.91	0.89	0.86	0.82	0.77	0.7	0.61	0.51	9.89
P0093587	2386894	1	0.93	0.92	0.91	0.9	0.88	0.85	0.82	0.76	0.7	0.62	10.92
P0007362	2299925	1	0.93	0.92	0.92	0.9	0.89	0.87	0.84	0.8	0.74	0.67	11.65
P0020628	2096606	1	0.92	0.91	0.91	0.9	0.88	0.85	0.81	0.75	0.67	0.57	10.29
P0184206	1658888	1	0.93	0.92	0.91	0.89	0.86	0.82	0.77	0.7	0.61	0.51	9.89
P0857946	2131870	1	0.93	0.92	0.91	0.9	0.88	0.86	0.82	0.77	0.7	0.62	11.01
P0741865	1887837	1	0.92	0.92	0.91	0.9	0.89	0.86	0.82	0.76	0.69	0.6	10.73
P0337002	1760920	1	0.93	0.92	0.91	0.9	0.88	0.85	0.8	0.75	0.67	0.59	10.52
P0947219	1773209	1	0.93	0.92	0.91	0.89	0.87	0.83	0.78	0.71	0.62	0.53	9.88
P0021581	1508223	1	0.92	0.91	0.9	0.88	0.84	0.78	0.7	0.6	0.48	0.37	8.39
P0863892	1342121	1	0.92	0.91	0.9	0.87	0.83	0.77	0.69	0.58	0.47	0.36	8.28
P0245909	1652104	1	0.93	0.92	0.9	0.88	0.85	0.8	0.73	0.65	0.55	0.45	9.06
P0847234	1638641	1	0.93	0.92	0.9	0.88	0.85	0.81	0.74	0.66	0.57	0.46	9.23
P0850372	2090932	1	0.92	0.92	0.91	0.9	0.89	0.88	0.85	0.81	0.76	0.69	11.76
P0640809	2386552	1	0.93	0.92	0.91	0.9	0.89	0.86	0.83	0.78	0.72	0.65	11.74
P0405623	1796430	1	0.92	0.91	0.9	0.89	0.86	0.82	0.76	0.67	0.57	0.46	9.3
P0018517	1940666	1	0.93	0.92	0.91	0.89	0.86	0.81	0.76	0.68	0.6	0.5	9.69
P0018518	1699783	1	0.93	0.92	0.9	0.87	0.83	0.78	0.7	0.61	0.51	0.41	8.78
P0149027	2098836	1	0.93	0.92	0.91	0.9	0.88	0.85	0.81	0.76	0.69	0.61	10.87
P0434420	1950284	1	0.92	0.92	0.91	0.9	0.88	0.86	0.82	0.77	0.7	0.61	10.67
P0313065	2137851	1	0.93	0.92	0.91	0.9	0.89	0.87	0.84	0.79	0.74	0.67	11.63
P0187292	1977012	1	0.92	0.92	0.91	0.9	0.89	0.87	0.84	0.79	0.73	0.65	11.1
P0450684	2254935	1	0.93	0.92	0.92	0.91	0.89	0.87	0.85	0.81	0.76	0.7	12.18
P0884455	1688889	1	0.93	0.92	0.91	0.89	0.86	0.83	0.77	0.7	0.62	0.52	9.96
P0664958	2030374	1	0.92	0.92	0.91	0.91	0.9	0.88	0.86	0.83	0.78	0.71	11.94
P0008101	2055400	1	0.92	0.92	0.91	0.91	0.9	0.88	0.86	0.83	0.79	0.72	12.09
P0008100	2871252	1	0.93	0.92	0.91	0.9	0.87	0.84	0.79	0.73	0.65	0.56	10.4
P0005845	2045236	1	0.92	0.92	0.91	0.91	0.9	0.88	0.86	0.83	0.78	0.72	12.09
P0836790	2160861	1	0.92	0.92	0.91	0.9	0.89	0.87	0.84	0.8	0.73	0.65	11.2
P0900431	2218029	1	0.93	0.92	0.92	0.91	0.89	0.87	0.84	0.8	0.75	0.69	11.93
P0078276	2092034	1	0.92	0.92	0.91	0.9	0.89	0.88	0.85	0.81	0.75	0.68	11.53
P0005862	1799631	1	0.93	0.92	0.91	0.89	0.86	0.82	0.76	0.69	0.6	0.5	9.72
P0451778	2078617	1	0.92	0.92	0.91	0.9	0.89	0.87	0.84	0.79	0.72	0.64	11.02
P0304817	1873490	1	0.93	0.92	0.91	0.89	0.86	0.82	0.77	0.7	0.63	0.55	10.25
P0202949	2103945	1	0.93	0.92	0.91	0.9	0.89	0.87	0.84	0.81	0.76	0.7	12.22
P0132886	2315542	1	0.92	0.92	0.91	0.91	0.9	0.89	0.88	0.86	0.82	0.78	13.16
P0968240	2120325	1	0.92	0.92	0.91	0.91	0.9	0.89	0.87	0.85	0.81	0.76	12.87
P0150962	2112867	1	0.92	0.92	0.91	0.91	0.9	0.89	0.87	0.85	0.81	0.76	12.89
P0361151	2281667	1	0.93	0.92	0.92	0.91	0.89	0.88	0.85	0.82	0.77	0.71	12.37
P0034119	2214700	1	0.93	0.92	0.92	0.91	0.9	0.88	0.86	0.83	0.79	0.74	13.03
P0985747	2211059	1	0.92	0.92	0.91	0.91	0.9	0.88	0.86	0.82	0.77	0.7	11.77
P0402350	1939646	1	0.93	0.92	0.92	0.9	0.89	0.86	0.83	0.78	0.72	0.65	11.39
P0237528	2289189	1	0.93	0.92	0.92	0.91	0.89	0.87	0.84	0.8	0.75	0.68	12.02
P0011716	1032047	1	0.92	0.88	0.81	0.71	0.59	0.46	0.33	0.22	0.14	0.08	5.44
P0018035	972045	1	0.91	0.87	0.79	0.68	0.54	0.39	0.27	0.17	0.1	0.06	4.95
P0018664	1143422	1	0.92	0.9	0.86	0.8	0.71	0.6	0.48	0.36	0.26	0.17	6.64
P0011734	1831098	1	0.93	0.91	0.89	0.86	0.82	0.77	0.72	0.65	0.58	0.5	9.93
P0011735	1278081	1	0.91	0.89	0.84	0.77	0.68	0.58	0.47	0.36	0.26	0.19	6.52
P0011742	1233809	1	0.92	0.9	0.86	0.8	0.71	0.61	0.5	0.39	0.29	0.21	6.84
P0003276	1617136	1	0.93	0.91	0.89	0.86	0.82	0.76	0.68	0.6	0.5	0.41	8.85
P0018349	602136	1	0.87	0.75	0.56	0.36	0.21	0.11	0.05	0.02	0.01	0.01	3.07
P0018350	1559394	1	0.93	0.91	0.89	0.86	0.82	0.76	0.68	0.59	0.5	0.4	8.83
P0011758	1762392	1	0.93	0.92	0.9	0.88	0.85	0.8	0.74	0.66	0.57	0.48	9.45
P0011759	1740566	1	0.93	0.92	0.91	0.89	0.87	0.84	0.79	0.73	0.66	0.58	10.61
P0011769	973843	1	0.9	0.83	0.71	0.56	0.4	0.26	0.16	0.09	0.05	0.02	4.13
P0011770	824224	1	0.89	0.81	0.67	0.5	0.34	0.2	0.11	0.06	0.03	0.02	3.8
P0011781	1402050	1	0.93	0.92	0.9	0.87	0.83	0.78	0.7	0.61	0.51	0.41	8.94
P0011782	1718082	1	0.93	0.91	0.9	0.87	0.83	0.77	0.69	0.6	0.5	0.4	8.8
P0011783	1986745	1	0.93	0.92	0.9	0.88	0.85	0.8	0.74	0.66	0.56	0.46	9.33
P0011784	1776676	1	0.92	0.91	0.9	0.88	0.84	0.78	0.71	0.62	0.51	0.41	8.82
P0011788	1845331	1	0.92	0.91	0.91	0.89	0.87	0.83	0.78	0.71	0.62	0.52	9.89
P0011789	1339971	1	0.92	0.9	0.86	0.8	0.72	0.61	0.49	0.37	0.26	0.17	6.65
P0016165	1933386	1	0.93	0.92	0.91	0.9	0.89	0.86	0.83	0.79	0.73	0.66	11.62
P0016174	1910259	1	0.93	0.92	0.91	0.9	0.87	0.84	0.79	0.73	0.65	0.56	10.33
P0018356	2318347	1	0.93	0.92	0.91	0.9	0.89	0.86	0.83	0.78	0.72	0.65	11.43
P0015968	291909	1	0.7	0.39	0.17	0.06	0.02	0.01	0	0	0	0	1.42
P0015973	1560317	1	0.93	0.92	0.9	0.87	0.83	0.77	0.7	0.6	0.49	0.39	8.71
P0003290	797544	1	0.89	0.82	0.68	0.52	0.35	0.21	0.12	0.06	0.03	0.02	3.86
P0011838	1563010	1	0.93	0.92	0.9	0.87	0.84	0.78	0.71	0.62	0.52	0.42	9.07
P0003275	2278990	1	0.93	0.92	0.91	0.9	0.89	0.87	0.84	0.8	0.74	0.68	12.01
P0011853	1649439	1	0.92	0.91	0.9	0.87	0.84	0.78	0.7	0.6	0.49	0.38	8.57
P0018359	1611017	1	0.93	0.92	0.9	0.88	0.85	0.8	0.74	0.66	0.58	0.48	9.7
P0015996	2070689	1	0.92	0.92	0.91	0.9	0.89	0.87	0.84	0.79	0.73	0.66	11.4
P0018694	2021240	1	0.93	0.92	0.91	0.9	0.88	0.85	0.81	0.76	0.69	0.62	11.19
P0011878	1108373	1	0.92	0.9	0.87	0.81	0.72	0.6	0.47	0.34	0.23	0.15	6.54
P0018364	1503101	1	0.93	0.91	0.9	0.87	0.82	0.76	0.68	0.58	0.48	0.37	8.51
P0003273	1762999	1	0.93	0.92	0.9	0.87	0.83	0.77	0.7	0.61	0.52	0.42	8.91
P0018371	1760267	1	0.92	0.91	0.91	0.89	0.87	0.84	0.79	0.72	0.63	0.53	9.97
P0016216	1448569	1	0.92	0.91	0.9	0.87	0.83	0.76	0.67	0.56	0.44	0.33	8.23
P0016217	1419491	1	0.92	0.91	0.89	0.86	0.81	0.73	0.63	0.51	0.4	0.29	7.77
P0018397	1818957	1	0.92	0.91	0.91	0.89	0.87	0.84	0.79	0.73	0.65	0.56	10.27
P0019146	2099881	1	0.93	0.92	0.92	0.91	0.9	0.88	0.85	0.82	0.78	0.73	12.69
P0018430	1147882	1	0.92	0.9	0.86	0.79	0.69	0.57	0.43	0.31	0.21	0.13	6.23
P0020839	2194275	1	0.92	0.92	0.91	0.9	0.89	0.87	0.85	0.81	0.76	0.7	12.04
P0011744	2034372	1	0.93	0.92	0.91	0.88	0.85	0.81	0.75	0.67	0.58	0.49	9.55
P0551292	905646	1	0.9	0.85	0.75	0.61	0.44	0.3	0.18	0.1	0.05	0.03	4.44
P0859417	2003280	1	0.92	0.91	0.91	0.9	0.88	0.85	0.81	0.76	0.69	0.61	10.79
P0016160	1096292	1	0.92	0.9	0.86	0.79	0.69	0.56	0.44	0.32	0.22	0.14	6.41
P0011848	1249326	1	0.92	0.9	0.86	0.8	0.71	0.6	0.48	0.36	0.25	0.17	6.61
P0020304	1505295	1	0.93	0.91	0.89	0.85	0.79	0.71	0.61	0.5	0.39	0.29	7.88
P0020381	1906426	1	0.92	0.92	0.91	0.9	0.87	0.84	0.79	0.72	0.63	0.53	10.16
P0020382	1896499	1	0.93	0.92	0.91	0.9	0.88	0.85	0.8	0.75	0.68	0.59	10.75
P0276815	1140244	1	0.92	0.9	0.85	0.78	0.67	0.54	0.41	0.28	0.18	0.11	6.12
P0958540	2036179	1	0.92	0.92	0.91	0.89	0.87	0.83	0.78	0.7	0.62	0.52	10.12
P0460777	1512297	1	0.93	0.92	0.9	0.88	0.84	0.79	0.72	0.63	0.52	0.42	8.9
P0259258	1705455	1	0.92	0.91	0.91	0.9	0.88	0.85	0.8	0.73	0.65	0.55	10.3
P0849824	2416778	1	0.92	0.92	0.91	0.9	0.89	0.87	0.84	0.8	0.74	0.66	11.29
P0591545	833910	1	0.9	0.83	0.71	0.55	0.4	0.26	0.15	0.09	0.05	0.02	4.18
P0018415	2254890	1	0.92	0.91	0.91	0.9	0.89	0.88	0.85	0.81	0.76	0.69	11.64
P0018419	1914921	1	0.92	0.91	0.89	0.86	0.81	0.74	0.65	0.55	0.45	0.36	8.63
P0519408	2410842	1	0.93	0.92	0.91	0.9	0.88	0.86	0.82	0.77	0.71	0.63	11.1
P0018416	1076487	1	0.91	0.87	0.79	0.67	0.52	0.37	0.24	0.14	0.08	0.04	4.86
P0018417	793395	1	0.9	0.82	0.69	0.53	0.36	0.22	0.13	0.07	0.03	0.02	3.95
P0018469	369570	1	0.76	0.49	0.25	0.11	0.04	0.02	0.01	0	0	0	1.74
P0238669	1731022	1	0.92	0.91	0.89	0.85	0.79	0.71	0.6	0.48	0.36	0.25	7.51
P0737800	2276234	1	0.93	0.92	0.91	0.9	0.88	0.84	0.8	0.74	0.67	0.58	10.52
P0065591	2207525	1	0.93	0.92	0.91	0.9	0.87	0.84	0.81	0.76	0.7	0.63	11.39
P0500826	2213187	1	0.92	0.91	0.91	0.89	0.88	0.85	0.81	0.76	0.69	0.62	10.97
P0018472	2200894	1	0.93	0.92	0.91	0.9	0.88	0.85	0.81	0.76	0.7	0.62	11.03
P0018532	2252223	1	0.92	0.91	0.91	0.9	0.88	0.86	0.82	0.77	0.71	0.63	11.02
P0018533	2212165	1	0.93	0.92	0.91	0.89	0.87	0.83	0.79	0.72	0.64	0.55	10.22
P0018481	2271499	1	0.93	0.92	0.91	0.9	0.88	0.86	0.82	0.77	0.71	0.63	11.13
P0411197	2366333	1	0.92	0.91	0.91	0.9	0.88	0.85	0.8	0.74	0.66	0.57	10.27
P0339838	2551477	1	0.93	0.92	0.92	0.91	0.9	0.88	0.86	0.83	0.79	0.74	12.8
P0018473	2238187	1	0.93	0.92	0.91	0.89	0.87	0.84	0.79	0.73	0.66	0.58	10.52
P0018568	2143680	1	0.92	0.91	0.91	0.9	0.88	0.85	0.8	0.73	0.65	0.55	10.09
P0018565	2136130	1	0.93	0.92	0.91	0.89	0.87	0.84	0.79	0.73	0.65	0.56	10.29
P0896861	2376297	1	0.93	0.92	0.91	0.9	0.89	0.87	0.84	0.8	0.75	0.69	11.9
P0012351	2516433	1	0.93	0.92	0.91	0.89	0.86	0.82	0.76	0.7	0.63	0.55	10.48
P0410957	788991	1	0.91	0.85	0.74	0.59	0.43	0.29	0.17	0.1	0.05	0.03	4.43
P0590943	2686213	1	0.92	0.92	0.91	0.91	0.9	0.88	0.86	0.83	0.78	0.71	12.32
P0569527	2522914	1	0.93	0.92	0.92	0.91	0.89	0.87	0.85	0.81	0.76	0.7	12.32
P0977091	2156695	1	0.92	0.92	0.91	0.9	0.89	0.88	0.85	0.81	0.75	0.68	11.65
P0701930	2395414	1	0.92	0.92	0.91	0.91	0.9	0.89	0.87	0.84	0.8	0.75	12.99
P0840247	2235314	1	0.93	0.92	0.92	0.91	0.9	0.88	0.85	0.82	0.78	0.72	12.9
P0844990	2215359	1	0.93	0.92	0.92	0.91	0.89	0.87	0.85	0.81	0.76	0.7	12.36
P0654592	2253338	1	0.92	0.92	0.91	0.9	0.89	0.88	0.85	0.81	0.75	0.68	11.64
P0414188	2041126	1	0.93	0.92	0.91	0.9	0.88	0.86	0.83	0.78	0.72	0.65	11.41
P0931331	2175969	1	0.93	0.92	0.91	0.9	0.89	0.86	0.83	0.79	0.74	0.68	12.04
P0250627	2027887	1	0.92	0.92	0.91	0.9	0.89	0.87	0.84	0.79	0.73	0.66	11.37
P0711053	2267369	1	0.93	0.92	0.91	0.9	0.87	0.84	0.79	0.74	0.66	0.58	10.62
P0931200	2368764	1	0.93	0.92	0.92	0.91	0.89	0.88	0.85	0.82	0.78	0.73	13.42
P0780205	1973330	1	0.92	0.91	0.91	0.89	0.88	0.85	0.8	0.74	0.67	0.58	10.51
P0846061	2164050	1	0.93	0.92	0.91	0.9	0.88	0.85	0.81	0.76	0.69	0.62	11.12
P0019029	2415145	1	0.93	0.92	0.91	0.9	0.88	0.85	0.81	0.75	0.69	0.61	10.91
P0019032	1853698	1	0.92	0.91	0.9	0.89	0.86	0.82	0.77	0.69	0.61	0.52	9.8
P0143230	1653046	1	0.93	0.92	0.9	0.87	0.83	0.77	0.7	0.61	0.5	0.4	8.79
P0749157	1882750	1	0.92	0.92	0.91	0.89	0.87	0.83	0.77	0.69	0.6	0.49	9.68
P0980161	2032765	1	0.93	0.92	0.9	0.88	0.85	0.8	0.74	0.66	0.56	0.46	9.4
P0270361	2092105	1	0.92	0.92	0.91	0.9	0.89	0.86	0.82	0.77	0.69	0.61	10.7
P0252261	2147507	1	0.93	0.92	0.91	0.9	0.88	0.85	0.81	0.76	0.7	0.62	11.11
P0803871	2173304	1	0.93	0.92	0.91	0.9	0.88	0.85	0.81	0.76	0.7	0.62	11.07
P0858235	877518	1	0.9	0.85	0.75	0.6	0.44	0.3	0.18	0.1	0.06	0.03	4.5
P0814199	2298316	1	0.93	0.92	0.92	0.91	0.89	0.88	0.85	0.82	0.77	0.71	12.43
P0498201	2245947	1	0.93	0.92	0.92	0.91	0.9	0.88	0.85	0.82	0.78	0.73	13.08
P0059261	2211475	1	0.92	0.92	0.91	0.9	0.88	0.86	0.83	0.79	0.74	0.68	11.95
P0596717	2559534	1	0.92	0.92	0.91	0.91	0.9	0.89	0.88	0.85	0.82	0.78	13.65
P0122128	2611701	1	0.92	0.92	0.91	0.91	0.9	0.89	0.87	0.85	0.81	0.77	13.31
P0278916	2190919	1	0.93	0.92	0.91	0.9	0.88	0.86	0.82	0.77	0.71	0.63	11.26
P0018512	2384807	1	0.92	0.92	0.91	0.9	0.9	0.88	0.86	0.83	0.79	0.73	12.42
P0018513	2492248	1	0.93	0.92	0.92	0.91	0.9	0.88	0.86	0.84	0.8	0.75	13.21
P0018514	2365264	1	0.92	0.92	0.91	0.91	0.9	0.88	0.86	0.83	0.78	0.71	12.09
P0113077	2024117	1	0.92	0.92	0.91	0.9	0.9	0.88	0.86	0.82	0.77	0.7	11.88
P0874601	2180656	1	0.93	0.92	0.92	0.91	0.89	0.87	0.85	0.81	0.77	0.71	12.28
P0185634	2415145	1	0.92	0.92	0.91	0.91	0.9	0.89	0.88	0.85	0.82	0.77	13.22
P0058823	2352044	1	0.92	0.92	0.91	0.9	0.89	0.88	0.85	0.82	0.79	0.74	12.98
P0130556	2418326	1	0.93	0.92	0.92	0.91	0.89	0.87	0.84	0.81	0.76	0.7	12.29
P0057486	2287765	1	0.92	0.92	0.91	0.9	0.89	0.88	0.86	0.82	0.78	0.73	12.66
P0450193	2684616	1	0.93	0.93	0.92	0.91	0.9	0.89	0.87	0.85	0.82	0.78	13.89
P0828106	2424809	1	0.92	0.92	0.91	0.91	0.9	0.9	0.88	0.87	0.84	0.81	14.05
P0273321	2228540	1	0.93	0.92	0.92	0.91	0.89	0.87	0.84	0.79	0.74	0.67	11.78
P0744295	2179978	1	0.93	0.92	0.91	0.9	0.89	0.87	0.84	0.8	0.74	0.68	11.88
P0872686	2022672	1	0.93	0.92	0.91	0.9	0.88	0.86	0.82	0.77	0.71	0.63	11.24
P0903803	2290117	1	0.92	0.92	0.91	0.9	0.89	0.88	0.85	0.81	0.75	0.68	11.54
P0980478	2864540	1	0.92	0.92	0.91	0.9	0.9	0.89	0.87	0.84	0.81	0.76	13.24
P0640751	2372466	1	0.93	0.92	0.92	0.91	0.89	0.88	0.85	0.82	0.77	0.72	12.71
P0182871	3044748	1	0.92	0.92	0.91	0.9	0.89	0.87	0.85	0.81	0.76	0.7	11.98
P0873282	2377866	1	0.92	0.92	0.91	0.9	0.89	0.87	0.84	0.81	0.76	0.7	12.36
P0198522	2020179	1	0.93	0.92	0.91	0.89	0.87	0.83	0.79	0.74	0.69	0.62	11.34
P0679250	2141600	1	0.92	0.91	0.91	0.9	0.88	0.86	0.83	0.79	0.74	0.68	12.24
P0005855	2052657	1	0.92	0.92	0.91	0.9	0.89	0.87	0.85	0.8	0.75	0.67	11.53
P0266464	2268075	1	0.93	0.92	0.91	0.89	0.87	0.84	0.79	0.73	0.65	0.56	10.36
P0018619	1870542	1	0.93	0.92	0.91	0.89	0.86	0.81	0.75	0.68	0.59	0.49	9.65
P0019101	1958862	1	0.93	0.92	0.91	0.9	0.87	0.84	0.79	0.73	0.66	0.57	10.65
P0019100	1844980	1	0.93	0.92	0.91	0.89	0.87	0.84	0.79	0.73	0.65	0.56	10.54
P0019102	1932407	1	0.92	0.92	0.91	0.9	0.88	0.86	0.82	0.77	0.7	0.61	10.89
P0008963	2765086	1	0.93	0.92	0.92	0.91	0.9	0.89	0.87	0.85	0.82	0.77	13.68
P0365571	2286260	1	0.93	0.92	0.91	0.9	0.88	0.86	0.83	0.78	0.72	0.65	11.47
P0335994	2006693	1	0.92	0.92	0.91	0.9	0.88	0.85	0.81	0.75	0.68	0.59	10.56
P0657753	2361022	1	0.93	0.92	0.91	0.89	0.86	0.82	0.77	0.7	0.62	0.53	9.97
P0537419	2115474	1	0.92	0.91	0.9	0.89	0.87	0.84	0.8	0.75	0.69	0.61	10.86
P0185637	1992297	1	0.92	0.91	0.9	0.89	0.87	0.84	0.79	0.72	0.64	0.54	9.97
P0946542	1835905	1	0.92	0.91	0.9	0.89	0.87	0.84	0.79	0.72	0.63	0.54	9.99
P0669924	2070890	1	0.93	0.92	0.91	0.9	0.88	0.85	0.81	0.76	0.69	0.61	10.9

## Sheet: Legend
Overview of the HiFi sequencing coverage for the complete study cohort. Fraction_X refers to the fraction of the genome that is covered by at least X reads. Column N indicates the mean genome-wide HiFi read depth.
